1 **Chromosomally unstable tumor cells specifically require KIF18A for proliferation**

2 Carolyn Marquis<sup>1</sup>, Cindy L. Fonseca<sup>1</sup>, Katelyn A. Queen<sup>1</sup>, Lisa Wood<sup>1</sup>, Sarah E.

3 Vandal<sup>1</sup>, Heidi L.H. Malaby<sup>1</sup>, Joseph E. Clayton<sup>2</sup>, and Jason Stumpff<sup>1</sup>

4

5 <sup>1</sup> Department of Molecular Physiology and Biophysics, University of Vermont,  
6 Burlington, VT 05405, United States

7

8 <sup>2</sup> BioTek Instruments Inc., Winooski, VT 05404, United States

9

10

11

12

13

14

15 **Correspondence to: Jason Stumpff**

16

17 University of Vermont

18 Department of Molecular Physiology and Biophysics

19 149 Beaumont Ave., HSRF 118

20 Burlington, VT 05405

21 Phone: (802) 656-7849

22 [jstumpff@uvm.edu](mailto:jstumpff@uvm.edu)

## 23 **Summary**

24 Chromosomal instability (CIN), characterized by frequent missegregation of  
25 chromosomes during mitosis, is a hallmark of tumor cells caused by changes in the  
26 dynamics and control of microtubules that comprise the mitotic spindle<sup>1-3</sup>. Thus, CIN  
27 tumor cells may respond differently than normal diploid cells to treatments that target  
28 mitotic spindle regulation. We tested this idea by inhibiting a subset of kinesin motor  
29 proteins that control spindle microtubule dynamics and mechanics but are not required  
30 for the proliferation of near-diploid cells. Our results indicated that KIF18A was required  
31 for proliferation of CIN cells derived from triple negative breast cancer or colorectal  
32 cancer tumors but was not required in near-diploid cells. CIN tumor cells exhibited  
33 mitotic delays, multipolar spindles due to centrosome fragmentation, and increased cell  
34 death following inhibition of KIF18A. Sensitivity to KIF18A knockdown was strongly  
35 correlated with centrosome fragmentation, which required dynamic microtubules but did  
36 not depend on bipolar spindle formation or mitotic arrest. Our results indicate the altered  
37 spindle microtubule dynamics characteristic of CIN tumor cells can be exploited to  
38 reduce the proliferative capacity of CIN cells.

## 39 **Introduction**

40 Genetic instability is a common feature of tumor cells, and a large number of tumor cells  
41 exhibit frequent loss or gain of chromosomes<sup>1</sup>. This chromosomal instability (CIN) is  
42 primarily attributable to defects leading to abnormal interactions between chromosomes  
43 and mitotic spindle microtubules, which in turn increase chromosome segregation  
44 errors<sup>2-7</sup>. While CIN contributes to tumor progression, heterogeneity, drug resistance,  
45 and metastasis, it has been proposed that the same properties driving instability could  
46 provide an Achilles' heel for CIN cell-specific targeted therapies<sup>1,8,9</sup>. Compared to  
47 chromosomally stable cells, CIN cells display increased spindle microtubule  
48 polymerization and reduced turnover of the attachments between spindle microtubules  
49 and kinetochores, which are specialized protein structures that assemble at the  
50 centromeric regions of mitotic chromosomes<sup>2,3</sup>. Thus, CIN cells may be particularly  
51 vulnerable to anti-mitotic therapies that target the microtubule cytoskeleton.

52

53 Consistent with this idea, microtubule-targeting agents are effective therapeutics for a  
54 wide variety of tumors<sup>10</sup>. Paclitaxel, a microtubule stabilizing drug routinely utilized to  
55 treat solid tumors, was originally demonstrated to induce cytotoxicity by preventing cells  
56 from completing mitosis<sup>11</sup>. However, due to adverse side effects associated with the  
57 broad inhibition of microtubule function, significant effort has been made to identify  
58 mitotic regulators that could be targeted with lower toxicity in cancer patients. While  
59 drugs targeting proteins essential for mitosis have shown promise in preclinical models,  
60 they have been largely unsuccessful in clinical trials<sup>12</sup>. One explanation for the apparent  
61 paradox presented by failed mitotic targeting strategies and the effective therapeutic

62 results seen with paclitaxel is that paclitaxel may not kill tumor cells in vivo simply by  
63 preventing mitotic progression. This idea is supported by work demonstrating that  
64 clinically relevant doses of paclitaxel induce abnormal, multipolar divisions in tumors,  
65 rather than preventing mitotic division altogether<sup>11,13</sup>. Furthermore, paclitaxel leads to  
66 induction of micronuclei due to chromosome segregation errors, which may activate  
67 innate immune pathways<sup>14</sup>. Thus, efforts to mimic the effects of paclitaxel on mitotic  
68 cells need to be refocused towards identifying proteins that can be targeted to disrupt  
69 normal bipolar divisions, ideally in a tumor cell specific manner.

70

71 Here, we tested the hypothesis that altered mitotic microtubule dynamics in CIN cells  
72 may confer sensitivity to inhibition of proteins that regulate microtubule dynamics or  
73 generate forces within mitotic spindles. Ideal targets would reduce CIN cell proliferation  
74 by inducing mitotic defects specifically in tumor cells. We focused our efforts on kinesin  
75 motors known to regulate spindle microtubule dynamics and mechanics that are also  
76 largely dispensable for division in diploid somatic cells.

77

## 78 **Results**

### 79 **KIF18A is required for the proliferation of CIN tumor cells**

80 To compare the impacts of altered kinesin function in cells with or without CIN, we  
81 measured cell proliferation in both stable, diploid breast epithelial MCF10A cells and the  
82 chromosomally unstable triple negative breast cancer (TNBC) cell lines MDA-MB-231,  
83 MDA-MB-468, and HCC1806<sup>15</sup> following knockdown (KD) of kinesin motor proteins.  
84 Specifically, the effects of KIF18A, KIF18B, KIF4A, KIF22/KID, and KIF2C/MCAK KD

85 were determined (Extended Data Fig 1). Cell proliferation was measured using an  
86 automated, high-contrast brightfield microscopy-based kinetic assay (Extended Data Fig  
87 2). KIF18A KD significantly reduced proliferation of all three TNBC cell lines, but did not  
88 affect the growth of diploid MCF10A cells (Fig 1 A-B). To determine if this trend holds in  
89 other tumor cell types, we measured proliferation in colorectal cancer (CRC) cells  
90 categorized as displaying either chromosomal instability (CIN) or microsatellite  
91 instability (MSI), a form of genomic instability arising from defective DNA repair in near-  
92 diploid tumor cells<sup>16</sup>. KIF18A KD significantly reduced the proliferation of two CIN cell  
93 lines but had minor effects on the proliferation of MSI cells (Fig 1C, Extended Data Fig  
94 1). The proliferation of chromosomally unstable HeLa Kyoto cells, which have been  
95 used extensively for studies of KIF18A function, was also reduced by KIF18A KD (Fig  
96 1C). CIN cells sensitive to KIF18A knockdown exhibited increased cell death following  
97 KIF18A siRNA treatment, while near-diploid HCT116 and MCF10A cells did not  
98 (Extended Data Fig 3). Taken together, the diploid cells tested here did not require  
99 KIF18A to proliferate, while the majority of CIN tumor cells displayed a dependence on  
100 KIF18A for efficient growth and survival.

101

### 102 **Loss of KIF18A induces prolonged mitotic delay in CIN tumor cells**

103 KIF18A is required for chromosome alignment in all cells but also promotes spindle  
104 assembly checkpoint satisfaction and progression through mitosis in some cell types<sup>17-</sup>  
105 <sup>23</sup>. To determine if proliferation defects seen in KIF18A-depleted CIN cells correlate with  
106 KIF18A's role in promoting timely metaphase-to-anaphase transitions, we compared the  
107 effects of KIF18A KD on mitotic progression in CIN cells and near-diploid cells. KIF18A

108 KD led to an increase in the percentage of mitotic CIN cells but did not significantly alter  
109 the percentage of mitotic cells within MCF10A or non-CIN CRC cell populations (Fig 2  
110 A-C and Extended Data Fig 4). Quantification of mitotic duration revealed that all cell  
111 types displayed a significant increase in the amount of time required to progress from  
112 nuclear envelope breakdown (NEB) to anaphase onset (AO) following KIF18A KD (Fig 2  
113 D-F). Consistent with previous work, the magnitude and variance of mitotic delays were  
114 larger in KIF18A KD CIN tumor cells than diploid (MCF10A) or near-diploid cells  
115 (HCT116) (Fig 2D)<sup>19–21,24,25</sup>. In addition, the cell types most sensitive to KIF18A KD  
116 contained a significant subpopulation of cells that failed to complete mitosis during the  
117 imaging studies and were arrested for up to 20 hours (Fig 2E). SW480 CIN cells, which  
118 were not dependent on KIF18A for proliferation, did not display extended mitotic arrest,  
119 suggesting that they are able to compensate for loss of KIF18A in order to complete cell  
120 division. These data suggest that proliferation defects in KIF18A-dependent CIN cells  
121 may stem from defects that prevent subpopulations of cells from completing mitosis.

122

### 123 **KIF18A-dependent CIN cells form multipolar spindles**

124 Analyses of mitotic spindles in KIF18A KD cells revealed that KIF18A-dependent CIN  
125 lines display a significant increase in multipolar spindles compared to non-KIF18A-  
126 dependent cell lines (Fig 3 A-B). Multipolar spindles were defined as spindles containing  
127 more than two microtubule organizing centers with foci of the pericentriolar component  
128  $\gamma$ -tubulin. Interestingly, the fold-increase in multipolar spindles following KIF18A KD was  
129 inversely proportional to the fold-decrease in proliferation for each cell type (Fig 3C).  
130 These data indicate that mitotic spindle assembly is abnormal in most KIF18A-

131 dependent CIN cells. However, HeLa cells, which displayed reduced proliferation  
132 following KIF18A KD, displayed a slightly different spindle phenotype. A fraction of HeLa  
133 cells exhibited fragmented  $\gamma$ -tubulin in response to KIF18A KD but overall did not display  
134 a significant increase in multipolar spindles (Fig 3B and Extended Data Fig 5A). These  
135 observations suggest that although abnormal  $\gamma$ -tubulin distribution occurs in KIF18A KD  
136 HeLa cells, other mechanisms may be keeping the spindles from becoming multipolar.  
137 To investigate this further, we examined the effects of KIF18A KD in combination with  
138 previously validated siRNAs targeting either CLASP1 or HSET, which have roles in  
139 maintaining centrosome integrity and clustering supernumerary centrosomes<sup>26–30</sup>. HeLa  
140 cells treated with siRNAs against both KIF18A and either HSET or CLASP1 exhibited a  
141 significant increase in multipolar spindles with more than two  $\gamma$ -tubulin foci compared to  
142 cells treated with siRNAs against a single target (Extended Data Fig 5B). These co-  
143 depletion phenotypes were rescued when GFP-KIF18A was inducibly expressed at  
144 levels similar to endogenous KIF18A, which were also sufficient to rescue mitotic  
145 progression defects caused by KIF18A KD (Extended Data Figure 5B-E). Notably, the  
146 combined effects of KIF18A and CLASP1 on spindle morphology were not specific for  
147 HeLa cells. Similar results were seen SW480 cells, suggesting this cell type also relies  
148 on other mechanisms for centrosome integrity in the absence of KIF18A (Extended  
149 Data Fig 5F). Together, these data suggest a function for KIF18A in preserving  
150 centrosome integrity that is essential for maintenance of spindle bipolarity in the majority  
151 of CIN cells tested.

152

153 Loss of KIF18A function could lead to multipolar spindles by promoting centrosome  
154 amplification, cytokinesis failure, centriole disengagement, or pericentriolar material  
155 (PCM) fragmentation<sup>31</sup>. To distinguish among these mechanisms, we analyzed the  
156 number and organization of centrioles within multipolar spindles in MDA-MB-231 cells  
157 (Fig 3 D-F). The majority of spindles (~75%) in both control and KIF18A KD cells  
158 contained four centrioles, indicating that centrosome amplification and cytokinesis  
159 failure do not significantly contribute to spindle defects in KIF18A KD cells.

160

161 The average distance between paired centrioles was increased in multipolar KIF18A KD  
162 cells compared to those in bipolar spindles but was comparable to the average distance  
163 measured in multipolar spindles treated with control siRNA (Fig 3F). However, ~60% of  
164 multipolar KIF18A KD cells exhibited  $\gamma$ -tubulin containing microtubule organizing centers  
165 without centrioles (Fig 3E). A similar trend was observed in HT-29 cells following  
166 KIF18A KD (Extended Data Fig 6). Furthermore, live imaging of KIF18A-depleted MDA-  
167 MB-231 cells labeled with siR-tubulin revealed an increase in spindle pole fragmentation  
168 events but not the number of cells entering mitosis with multiple poles compared to  
169 control siRNA treated cells (Fig 3 G-I and Supplementary Videos 1-3). These data  
170 suggest that KIF18A KD primarily leads to multipolar spindles by inducing PCM  
171 fragmentation.

172

173 **KIF18A KD induces multipolar spindles in CIN cells independently of mitotic**  
174 **delay**



175 The fragmentation of centrosomes and formation of multipolar spindles following  
176 KIF18A KD could result from abnormal spindle forces caused by altered microtubule  
177 dynamics or as a secondary effect of an extended mitotic delay<sup>31</sup>. To determine if a  
178 mitotic delay is required for multipolar spindle formation following KIF18A KD, we  
179 analyzed spindle morphology in MDA-MB-231 cells depleted of both KIF18A and MAD2,  
180 which is required for spindle assembly checkpoint-dependent mitotic arrest<sup>32</sup>.  
181 KIF18A/MAD2 KD cells displayed a reduced mitotic index but a similar level of  
182 multipolar spindles compared to KIF18A KD cells (Extended Data Fig 7 A-B). Spindle  
183 pole splitting in live cells occurred at a range of times after mitotic entry in KIF18A KD  
184 cells and at times shortly after NEB in KIF18A/MAD2 KD cells (Extended Data Fig 7 C-E  
185 and Supplementary Video 4). The significant decrease in multipolar KIF18A/MAD2 KD  
186 cells compared to KIF18A KD alone observed during live imaging may be explained by  
187 the limitations inherent to the identification of multipolar spindles in live assays, as poles  
188 must split sufficiently far apart to be completely separated in this case. Therefore, the  
189 live approach is likely to underestimate the actual time to splitting and percentage of  
190 multipolar spindles, especially in cells that exit mitosis quickly. Taken together, these  
191 data suggest that loss of KIF18A leads to spindle pole fragmentation in CIN cells and  
192 that this defect does not require, but may be enhanced by, a mitotic delay.

193

#### 194 **Centrosome fragmentation in KIF18A KD cells requires dynamic microtubules**

195 KIF18A functions to suppress microtubule growth within mitotic spindles<sup>18,33</sup>, suggesting  
196 that abnormal microtubule dynamics in KIF18A KD cells may contribute to centrosome  
197 fragmentation. We tested this idea by reducing microtubule polymerization or

198 depolymerizing microtubules completely via treatment of KIF18A KD MDA-MB-231 cells  
199 with 20 nM paclitaxel or 5  $\mu$ M nocodazole, respectively<sup>34,35</sup>. KIF18A KD cells treated with  
200 either paclitaxel or nocodazole for 3 hours before fixation displayed significantly fewer  
201 multipolar spindles than KIF18A KD cells treated with DMSO (Fig 4A). These data  
202 indicate that dynamic microtubules are required for KIF18A KD-induced centrosome  
203 fragmentation.

204

205 Paclitaxel treatment causes an increase in multipolar spindles in both somatic diploid  
206 cells and aneuploid cancer cells<sup>13,36,37</sup>, whereas KIF18A KD preferentially affected  
207 spindle morphology in the CIN cells tested here (Fig 3A-B). To directly compare the two  
208 treatments, we analyzed MDA-MB-231 and MCF10A cells after KIF18A KD or  
209 incubation with a clinically relevant dose of paclitaxel (10 nM) for 24 hours in parallel<sup>13</sup>.  
210 Paclitaxel treatment led to increased multipolar spindles in both MDA-MB-231 cells and  
211 MCF10A cells, while KIF18A KD only induced multipolar spindles in MDA-MB-231 cells  
212 (Extended Data Fig 8). Thus, paclitaxel and KIF18A KD induce a similar spindle  
213 phenotype but appear to act via antagonistic mechanisms, consistent with their opposite  
214 effects on spindle microtubule dynamics. Furthermore, sensitivity to KIF18A loss of  
215 function is higher in the CIN cell lines tested here than in near-diploid MCF10A cells.

216

### 217 **Centrosome fragmentation in KIF18A KD cells does not require bipolar spindle** 218 **formation**

219 Our live imaging studies indicated that KIF18A KD MDA-MB-231 and HT29 cells form  
220 bipolar spindles before centrosome fragmentation occurs (Fig 3, Extended Data Fig 6,

221 and Supplementary Videos 1-3). Therefore, altered microtubule dynamics in KIF18A KD  
222 cells could lead to centrosome fragmentation by disrupting the balance of pushing and  
223 pulling forces within bipolar spindles. To test this idea, we assayed the number of  $\gamma$ -  
224 tubulin foci in MDA-MB-231 cells treated with the KIF11 inhibitor monastrol, which  
225 induces monopolar spindles by preventing KIF11-dependent anti-parallel microtubule  
226 sliding forces<sup>38</sup>. We found that centrosome fragmentation still occurred in monopolar  
227 KIF18A KD cells and could be reduced by co-treatment with paclitaxel (Fig 4 B-C). Live  
228 imaging of monastrol treated cells expressing RFP-pericentrin to label centrosomes  
229 revealed that centrosomes begin intact in monopolar KIF18A KD cells and subsequently  
230 fragment (Supplementary Video 5). These data suggest that neither bipolar spindles nor  
231 the forces generated via KIF11-dependent microtubule sliding are required for  
232 centrosome fragmentation in the absence of KIF18A.

233

### 234 **The effects of KIF18A KD are enhanced by activation of MCAK/KIF2C**

235 In addition to suppressing the growth of kinetochore microtubules, KIF18A is required to  
236 decrease kinetochore microtubule turnover<sup>18,39</sup>. Thus, we reasoned that increased  
237 kinetochore microtubule turnover may contribute to the prolonged mitotic delays and  
238 destabilized spindles observed in KIF18A KD CIN cells. To test this, we treated cells  
239 with a small molecule (UMK57) that promotes kinetochore microtubule turnover by  
240 increasing the activity of the depolymerizing kinesin MCAK/KIF2C<sup>40</sup>. Treatment of  
241 KIF18A-depleted MDA-MB-231 cells with UMK57 (500 nM) decreased proliferation and  
242 significantly increased the mitotic index compared to KIF18A KD cells treated with  
243 DMSO (Fig 4 D-E and Extended Data Fig 9A). The same concentration of UMK57 had

244 no impact on the proliferation of control siRNA-treated cells (Fig 4D). UMK57 treatment  
245 of KIF18A KD cells also led to a small but significant increase in multipolar spindles, and  
246 this effect was replicated in cells with increased global MCAK/KIF2C activity, due to  
247 over-expression of mCherry-MCAK, or increased MCAK/KIF2C activity at centromeres,  
248 due to expression of mCherry-CPB-MCAK<sup>41</sup> (Fig 4F and Extended Data Fig 9B).  
249 Furthermore, in live cells labeled with siR-tubulin, co-depletion of both KIF18A and  
250 KIF2C reduced multipolar spindle formation compared to depletion of KIF18A alone,  
251 while KIF18A KD cells treated with UMK57 displayed increased spindle pole  
252 fragmentation (Extended Data Fig 9 C-F and Supplementary Video 6). These data  
253 indicate that loss of KIF18A function combined with increased KIF2C function,  
254 particularly at centromeres, synergistically disrupts mitotic progression and spindle  
255 bipolarity.

256

## 257 **Discussion**

258 Our data support a model in which the altered microtubule dynamics in mitotic CIN cells  
259 make them particularly dependent on KIF18A to reduce kinetochore microtubule  
260 turnover and limit microtubule growth. In the absence of KIF18A activity, centrosome  
261 fragmentation occurs and mitotic progression is slowed or prevented. Importantly, these  
262 effects were not observed in the near-diploid, chromosomally stable cells tested here,  
263 which is consistent with previous observations that reduction of KIF18A activity leads to  
264 longer spindle assembly checkpoint-dependent delays in cancer cells than diploid  
265 somatic cells<sup>17,19-23</sup>. KIF18A is also largely dispensable for proliferation of diploid  
266 somatic cells *in vivo* but is necessary for tumor growth. *Kif18a* mutant mice display an

267 early growth delay and germline development defects<sup>19,42</sup>. However, the growth of both  
268 induced CRC and xenografted TNBC tumors in mouse models are dependent on  
269 KIF18A<sup>43,44</sup>. Thus, KIF18A may be an effective target to specifically inhibit the growth of  
270 CIN tumor cells, while inducing relatively low toxicity in somatic, diploid cells.

271

272 These data raise the important question of why CIN cells would depend more on  
273 KIF18A for successful mitosis than chromosomally stable cells. CIN cells exhibit  
274 increased rates of spindle microtubule polymerization and altered turnover of  
275 kinetochore microtubules<sup>2,3</sup>, which may confer an enhanced dependence on KIF18A's  
276 function to suppress microtubule growth<sup>18,45,46</sup>. Our results suggest that in the absence  
277 of KIF18A activity, maintenance of kinetochore microtubule attachments and  
278 centrosome integrity are compromised in CIN cells, subsequently leading to extended  
279 mitotic arrest and centrosome fragmentation. These phenotypes were suppressed by  
280 treatments that reduce microtubule dynamics (nocodazole, paclitaxel, and KIF2C KD)  
281 and were enhanced by treatments that increase microtubule dynamics (UMK57, KIF2C  
282 overexpression) or compromise centrosome integrity (CLASP1 or HSET KD). Taken  
283 together, these data support a model in which the combined effects of increased  
284 microtubule polymerization in CIN cells and loss of KIF18A's microtubule growth  
285 suppression create a force imbalance within spindles that reduces centrosome integrity  
286 (Fig 4G). Additionally, this force imbalance does not require a bipolar spindle  
287 configuration or KIF11-dependent microtubule sliding within the spindle, as indicated by  
288 centrosome fragmentation in monastrol treated cells.

289

290 We also observed that a significant fraction of CIN cells are able to complete mitosis  
291 after a mitotic delay. Loss of KIF18A could also slow the growth of this population by  
292 inducing chromosome segregation errors. KIF18A KD increases the frequency of  
293 micronucleus formation as a result of chromosome alignment defects, and these  
294 micronucleated cells display reduced proliferation<sup>20</sup>. In support of this idea, recent work  
295 indicates that the frequency of KIF18A KD-dependent micronuclei is increased in cells  
296 with elevated chromosome number and correlates with reduced proliferation in  
297 aneuploid cells<sup>47,48</sup>.

298

299 The mitotic defects induced by KIF18A KD, multipolar spindles and micronuclei, are  
300 similar to those proposed to underlie the anti-tumor activity of paclitaxel<sup>11,14</sup>, yet KIF18A  
301 KD and paclitaxel have antagonistic effects on microtubule dynamics and lead to  
302 reduced multipolar spindle formation when combined. This suggests that increases or  
303 decreases in microtubule dynamics may compromise spindle integrity in CIN tumor  
304 cells, an idea supported by observations that multipolar spindles form in cells with  
305 dampened microtubule dynamics due to KIF18A overexpression<sup>45</sup>. Our tests of other  
306 kinesins that control spindle microtubule dynamics and chromosome movements  
307 suggest the observed dependence of CIN cells on KIF18A is unique. In agreement, two  
308 recent, large-scale bioinformatics studies identified *Kif18A*, but not other kinesins, as a  
309 gene specifically required for the growth of cells displaying aneuploidy or whole genome  
310 duplication<sup>47,48</sup>. Thus, KIF18A represents a potential target for exploiting vulnerabilities  
311 specific to a significant fraction of tumor cells displaying CIN or aneuploidy.

312

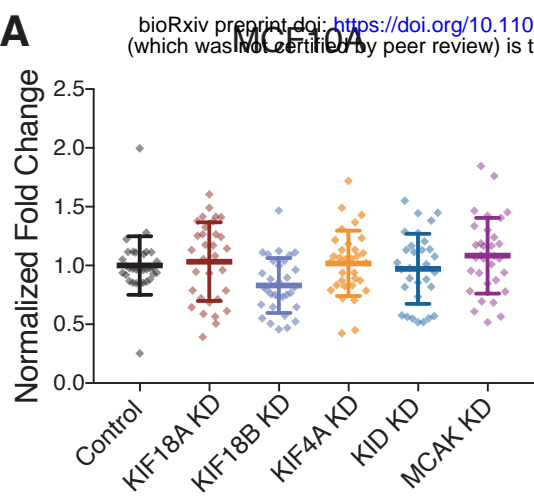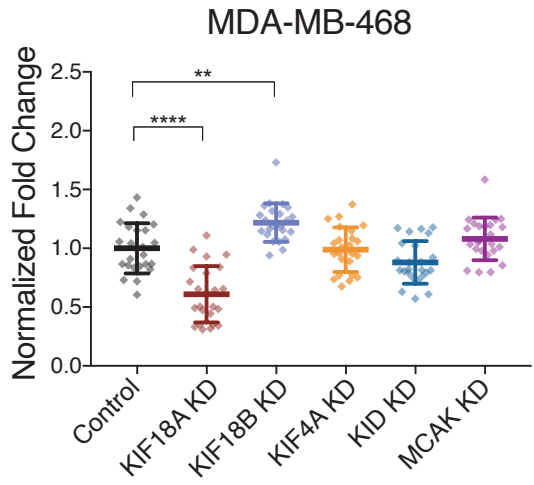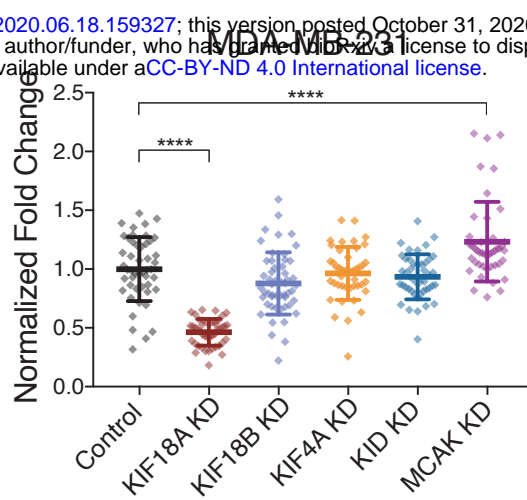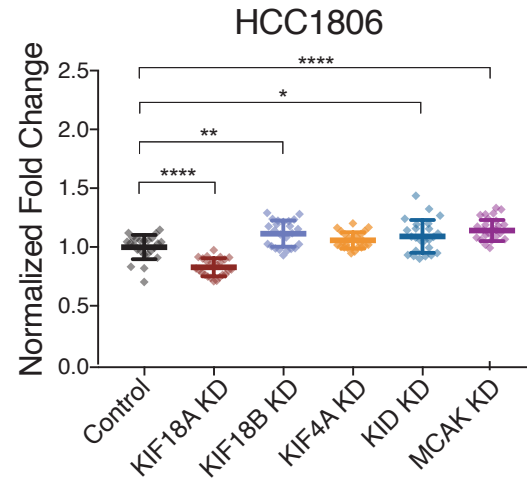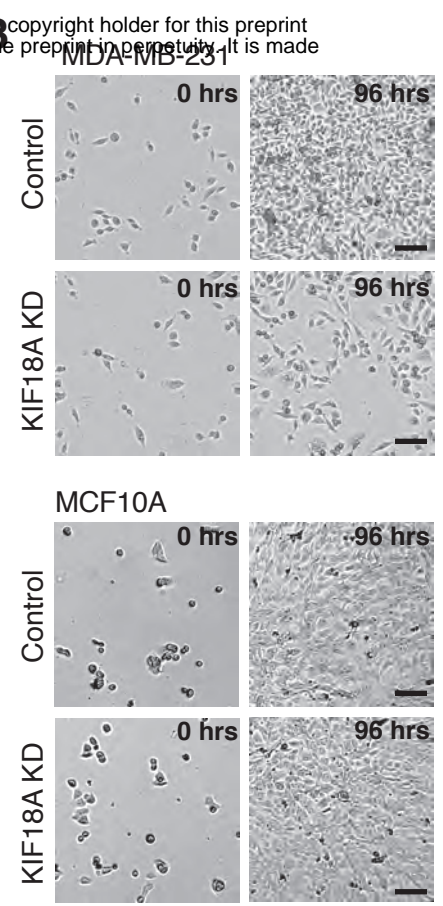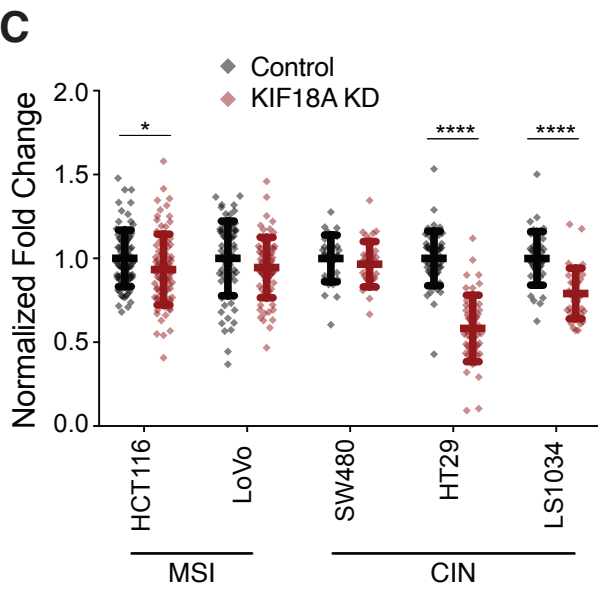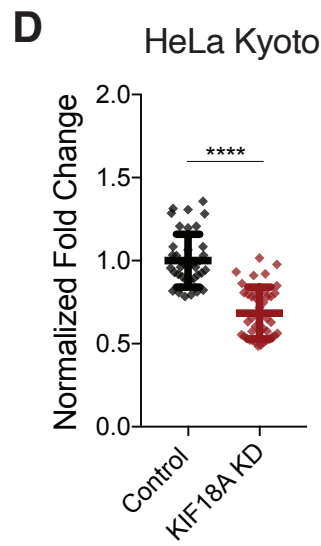

313 **Figure 1. KIF18A is required for the proliferation of chromosomally unstable cells.**

314 (A) Fold change in cell density (cells/mm<sup>2</sup>) after 96 hours in the indicated cell lines  
315 following knockdown (KD) of kinesin proteins. Data are normalized to cells treated with  
316 control siRNA. At least 24 wells per condition from three independent experiments were  
317 analyzed.

318 (B) Representative images of MDA-MB-231 and MCF10A cells treated with either  
319 control or KIF18A siRNA. Scale bars are 100 microns.

320 (C) Normalized fold change in cell density (cells/mm<sup>2</sup>) of MSI and CIN colorectal cancer  
321 cell lines after 96 hours. At least 24 wells per condition from three independent  
322 experiments were analyzed in A and C.

323 (D) Normalized fold change in cell density (cells/mm<sup>2</sup>) of HeLa Kyoto cells after 96  
324 hours. Data were generated from two independent experiments.

325 All graphs show mean +/- SD. \*\*\*\* p<0.0001, \*\*\* p<0.001, \*\* p<0.01, \* p<0.05

326



**A**

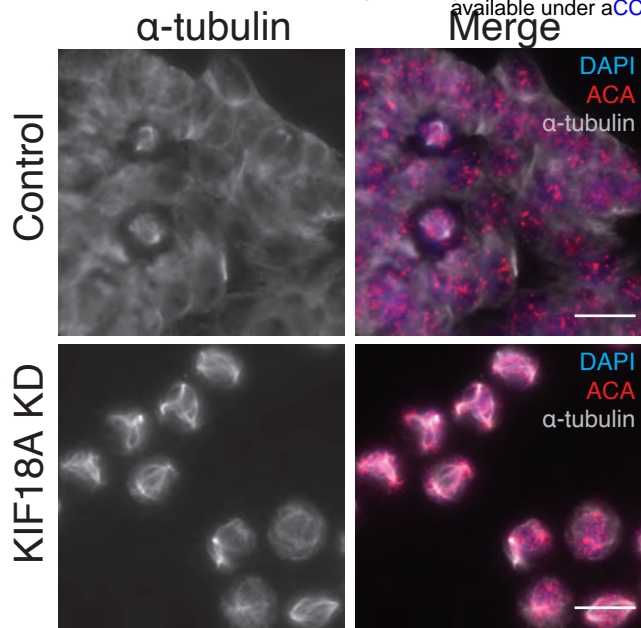

**B**

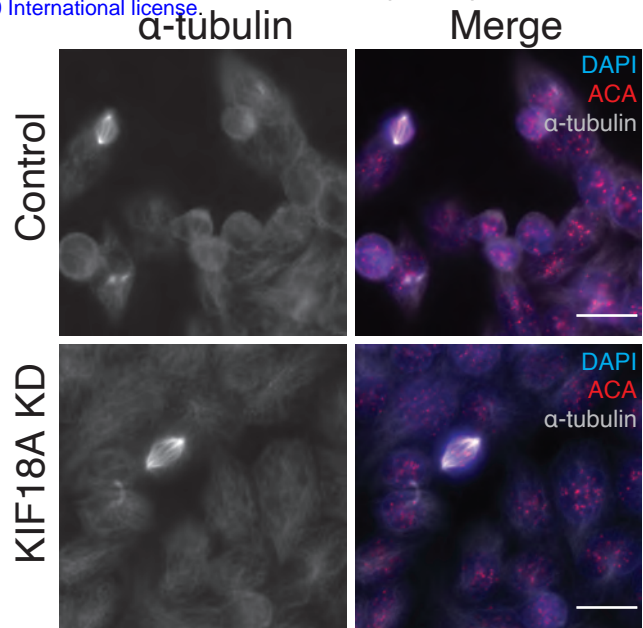

**C**

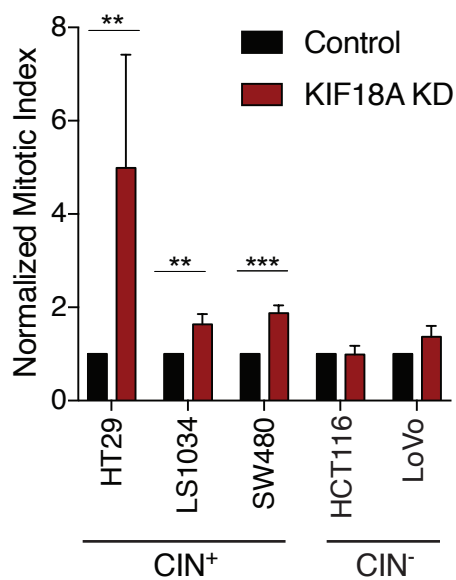

**D**

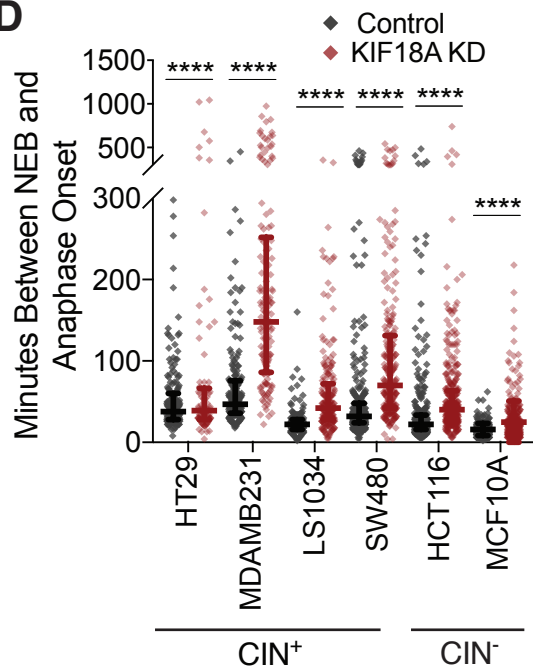

**E**

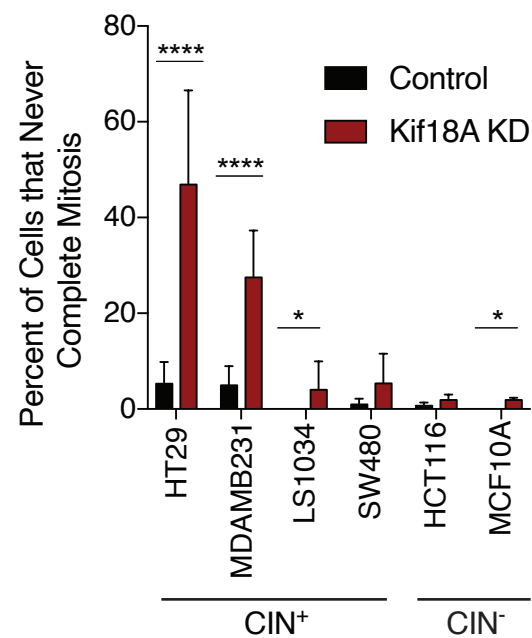

**F**

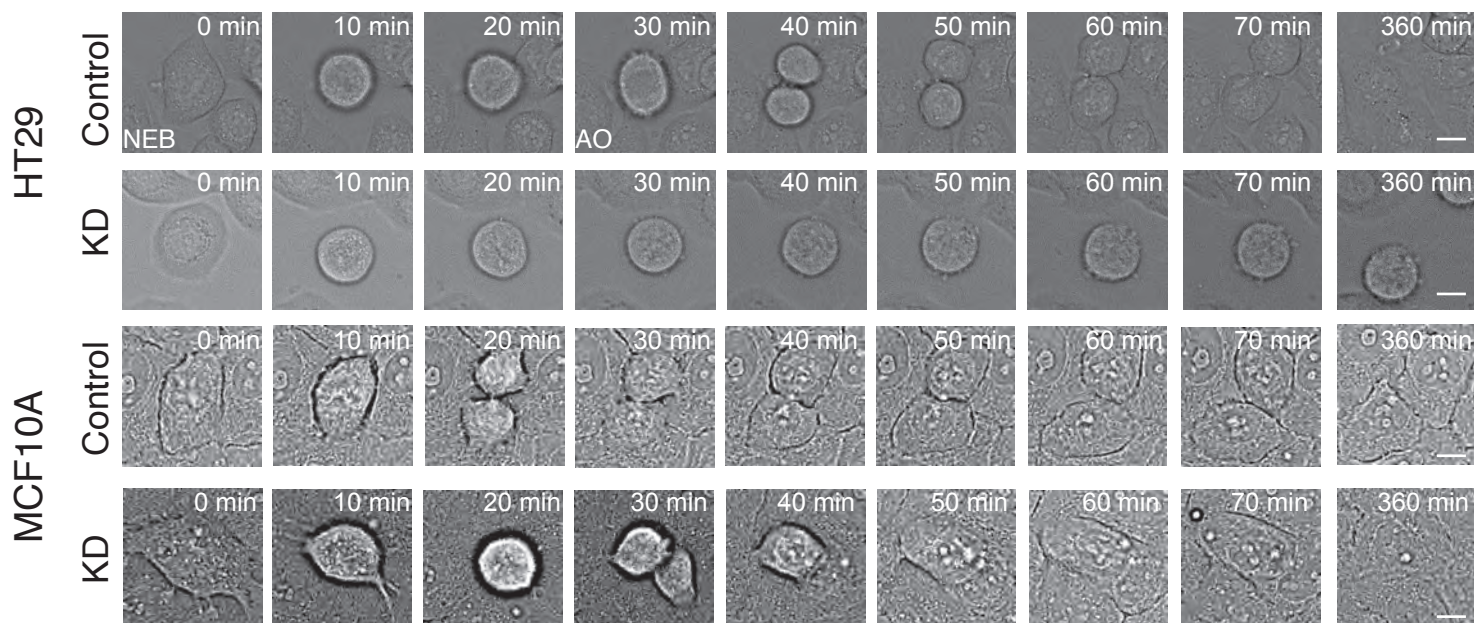

327 **Figure 2. KIF18A depletion causes mitotic arrest in CIN cancer cells.**

328 (A,B) Representative images of HT29 (A) or HCT116 cells (B) treated with control or  
329 KIF18A siRNAs. Scale bars are 10 microns.

330 (C) Percentage of mitotic cells (mitotic index) observed in fixed populations of control or  
331 KIF18A siRNA-treated CRC cells. At least 60 fields from three independent experiments  
332 were analyzed per condition.

333 (D) Time between nuclear envelope breakdown (NEB) and anaphase onset (AO) in  
334 control or KIF18A siRNA-treated cells. At least 150 cells from three independent  
335 experiments were analyzed per condition.

336 (E) Percentage of control or KIF18A siRNA-treated cells that entered mitosis at least  
337 200 minutes before the end of the movie but did not divide.

338 (F) Frames from DIC live cell imaging of HT29 and MCF10A cells treated with control or  
339 KIF18A siRNA, showing progression from NEB to AO. Scale bars are 5 microns.

340 All graphs show mean +/- SD. \*\*\*\* p<0.0001, \*\*\* p<0.001, \*\* p<0.01, \* p<0.05

341

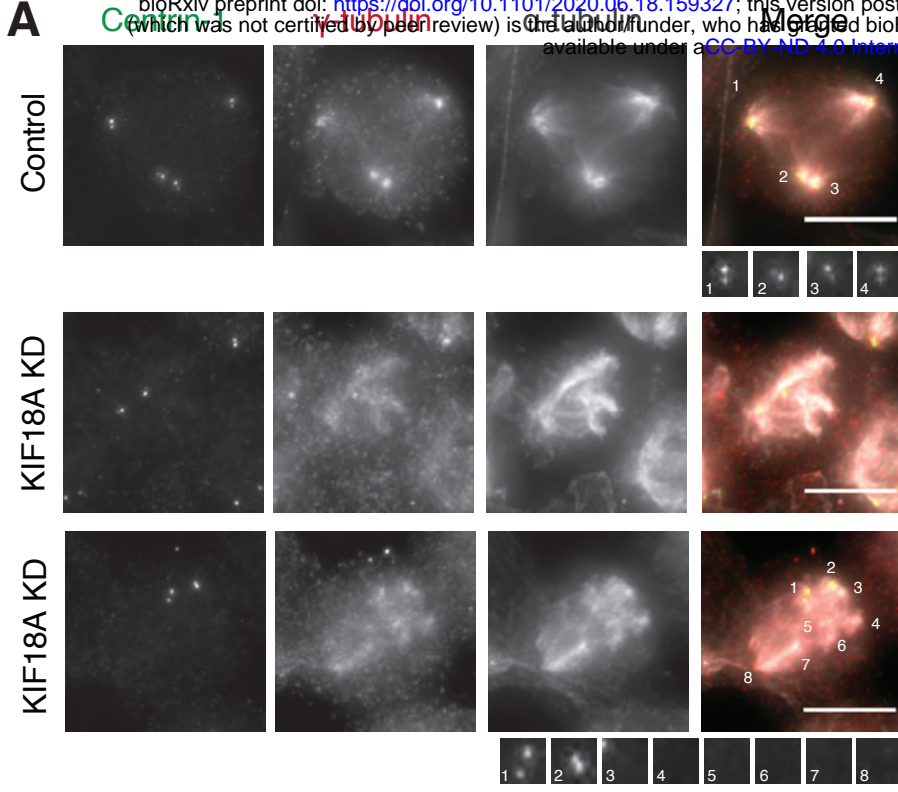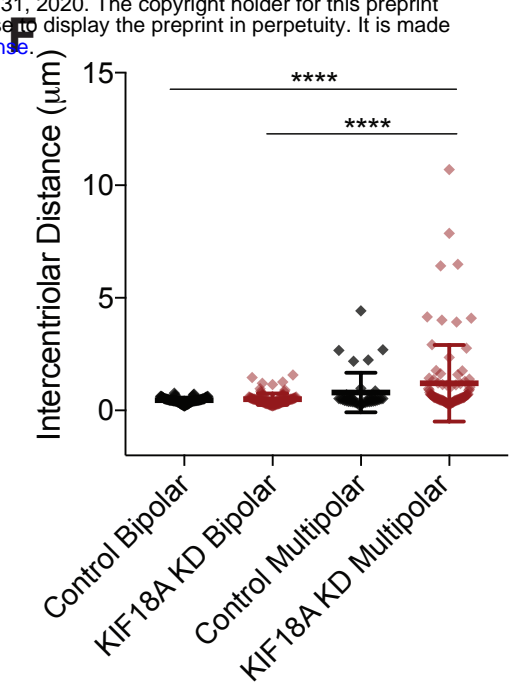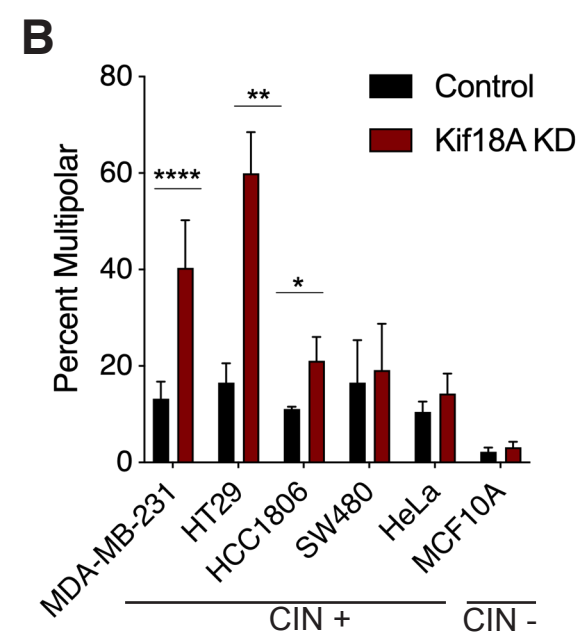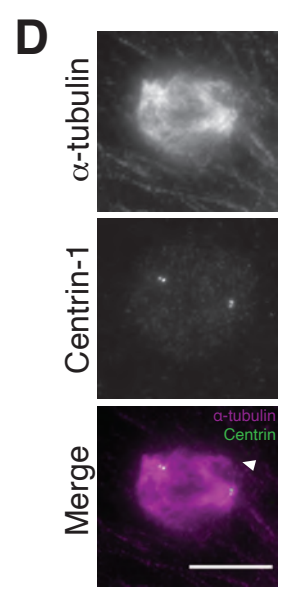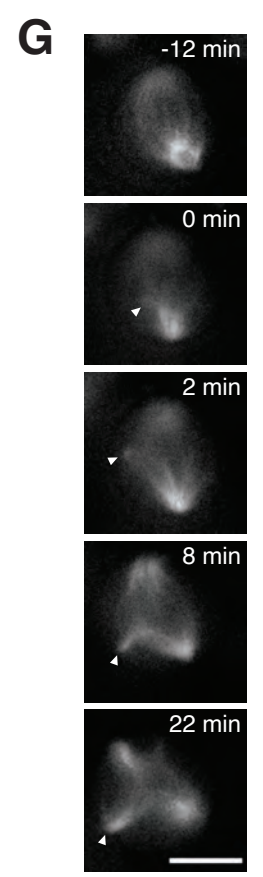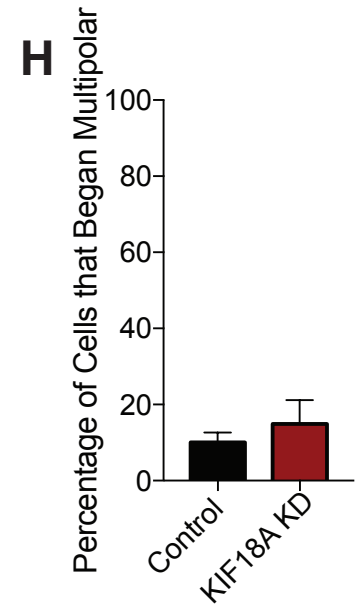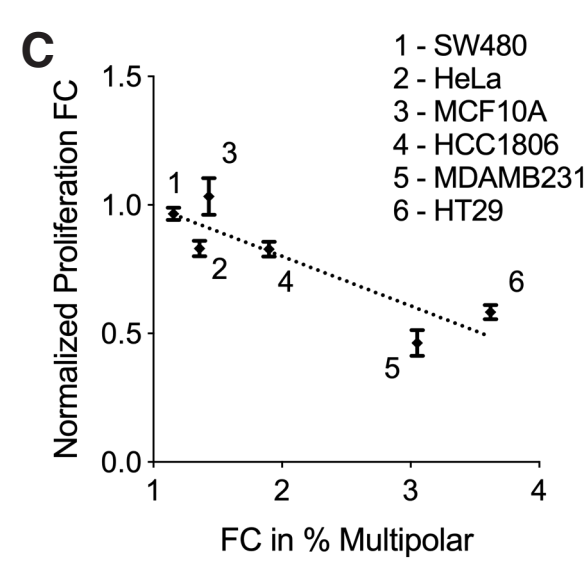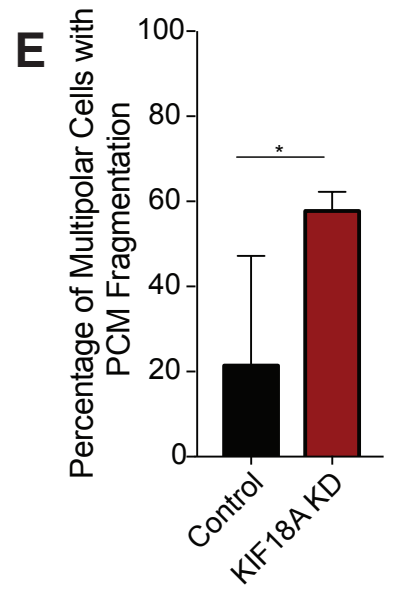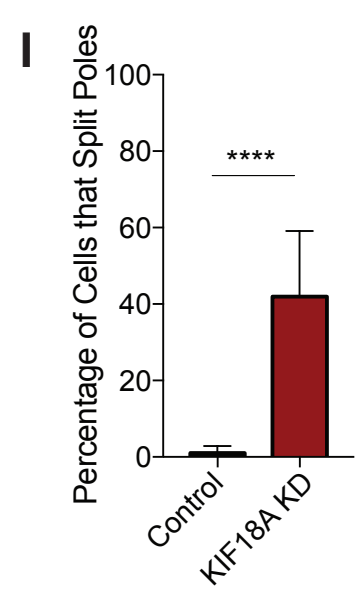

342 **Figure 3. Loss of KIF18A causes centrosome fragmentation in MDA-MB-231 cells.**

343 (A) Representative images of MDA-MB-231 cells treated with either control (top) or  
344 KIF18A (bottom) siRNA. Pericentriolar material ( $\gamma$ -tubulin) is numbered to show poles  
345 with and without centrioles (centrin-1). Scale bars are 10 microns.

346 (B) Percent of mitotic cells with multipolar spindles from fixed cell images of each  
347 indicated cell line treated with either control or KIF18A siRNA. Data were generated  
348 from at least three independent experiments per cell line.

349 (C) Plot of multipolar spindle percentage as a function of fold-change (FC) in cell  
350 number for the indicated cell lines following KIF18A KD. R-squared value is 0.79 using a  
351 linear regression model.

352 (D) Representative Images of MDA-MB-231 cell with a third pole lacking centrin-1.  
353 Scale bar is 10 microns.

354 (E) Percent of multipolar MDA-MB-231 cells in mitosis with fragmented pericentriolar  
355 material (PCM), as indicated by the presence of  $\gamma$ -tubulin puncta lacking centrin-1  
356 puncta.

357 (F) Intercentriolar distance measurements (in microns) for MDA-MB-231 cells in each  
358 indicated category.

359 (G) Representative still frames of a live MDA-MB-231 KIF18A KD cell labeled with siR-  
360 tubulin. Arrows indicate pole splitting and separation.

361 (H, I) Percent of live, siR-tubulin labeled MDA-MB-231 cells that (H) enter mitosis with  
362 more than two spindle poles or (I) split and separate spindle poles during mitosis. Data  
363 from three independent experiments.

364 All graphs show mean +/- SD. \*\*\*\* p<0.0001, \*\*\* p<0.001, \*\* p<0.01, \* p<0.05



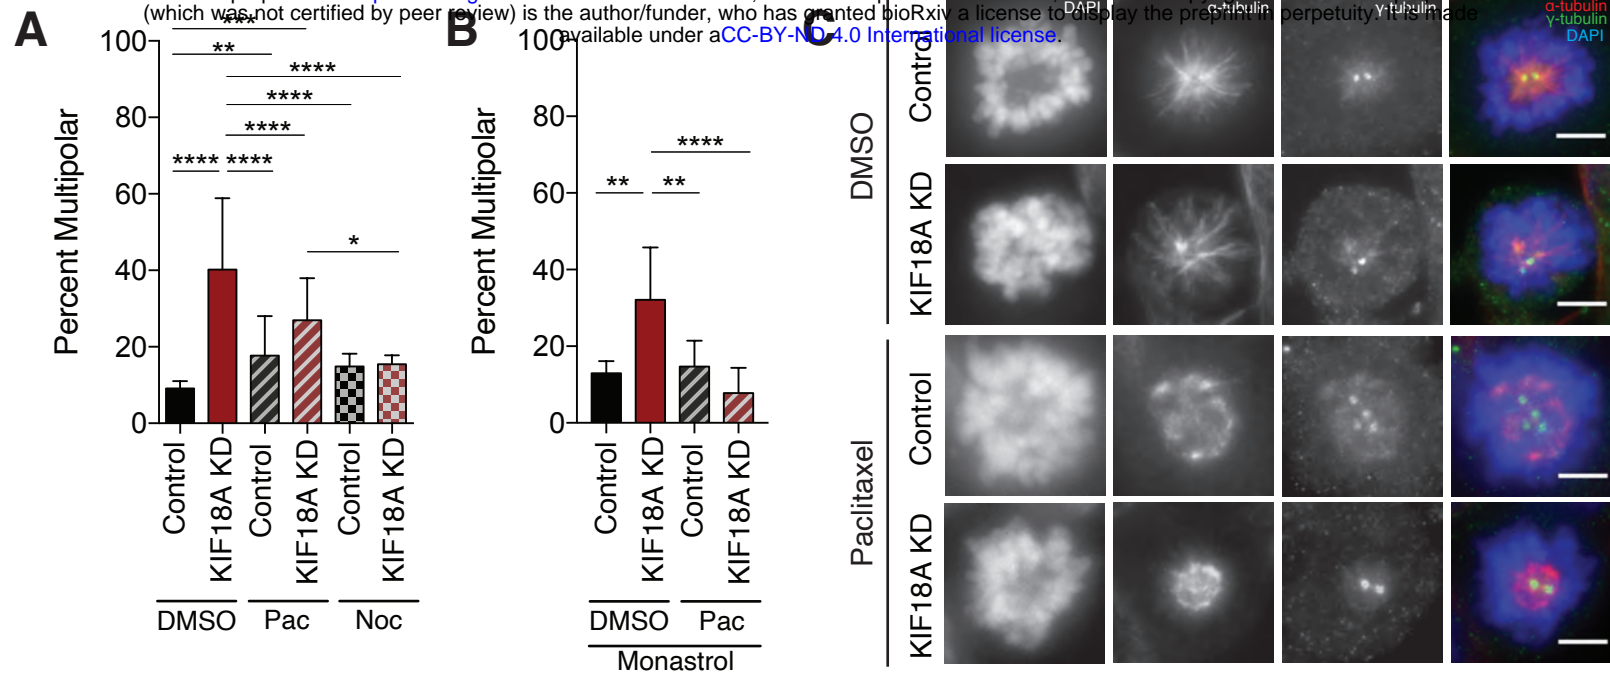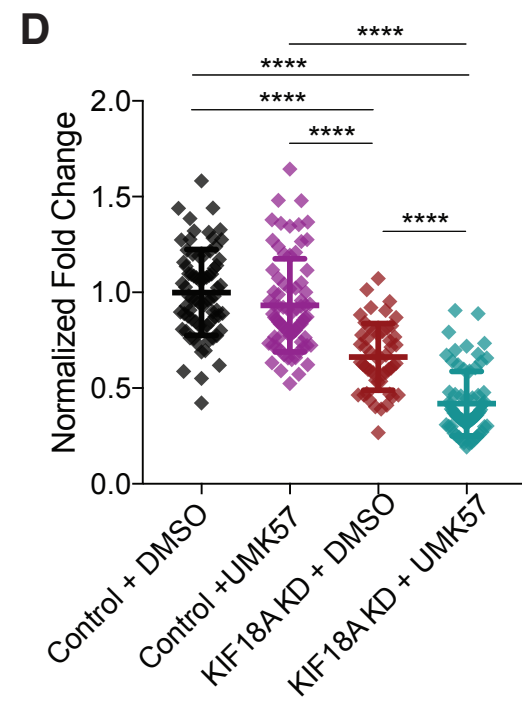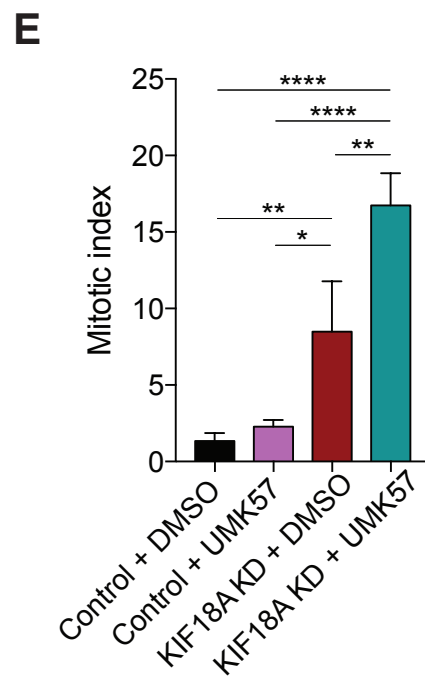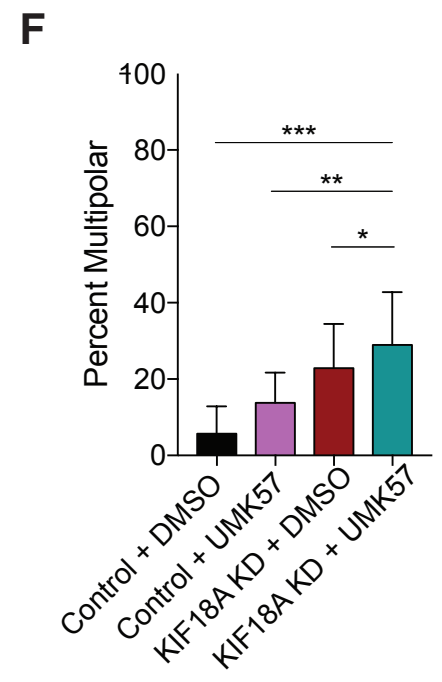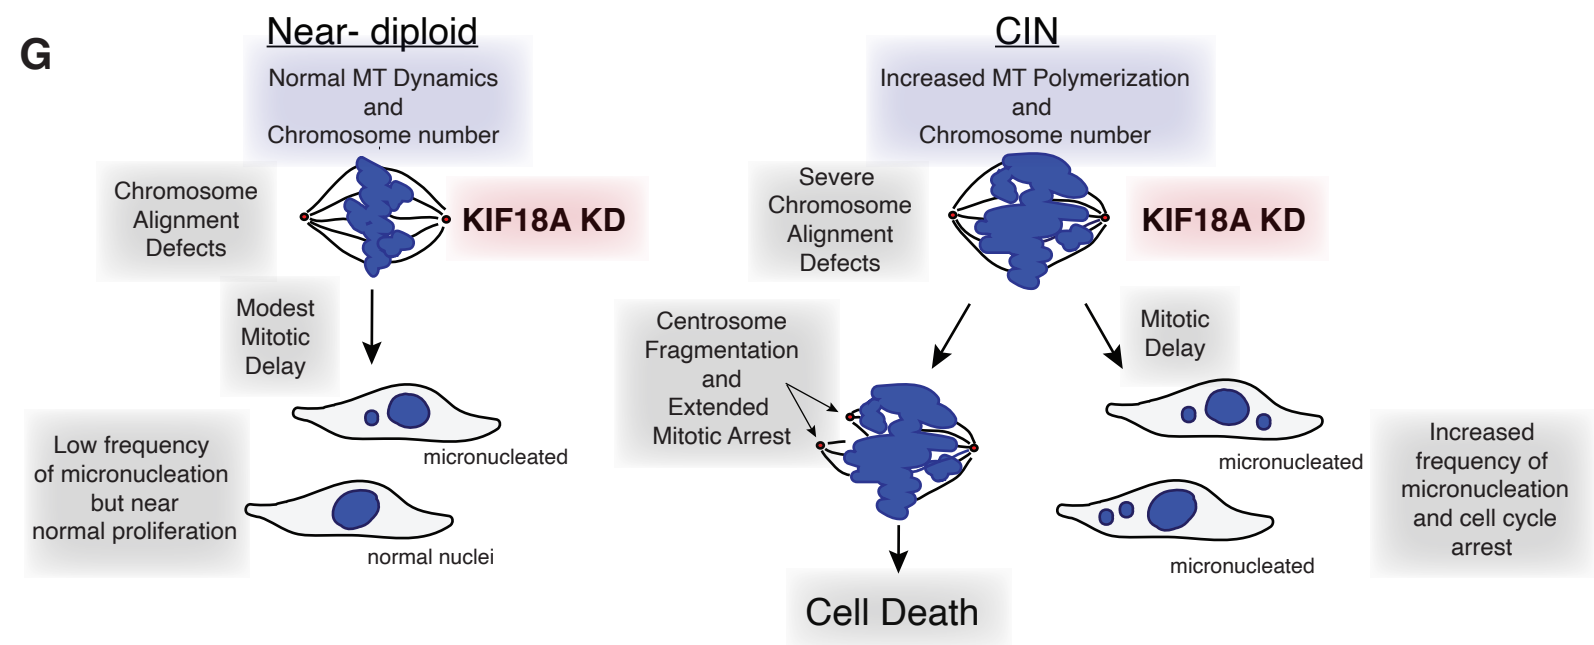

365 **Figure 4. KIF18A KD-induced defects depend on dynamic microtubules and are**  
366 **enhanced by increased KIF2C/MCAK activity.**

367 (A) Percent of MDA-MB-231 cells with multipolar spindles in control or KIF18A KD cells  
368 treated with either DMSO, 20 nM Paclitaxel (Pac), or 5  $\mu$ M Nocodazole (Noc) for three  
369 hours. At least 150 mitotic cells were analyzed per condition from three independent  
370 experiments.

371 (B) Percent of monopolar MDA-MB-231 cells with three or more  $\gamma$ -tubulin puncta in  
372 control or KIF18A KD cells treated with both monastrol (20  $\mu$ M) and either DMSO or 20  
373 nM Paclitaxel. At least 100 monopolar cells were analyzed per condition from three  
374 independent experiments.

375 (C) Representative images of MDA-MB-231 cells treated with 20  $\mu$ M monastrol and  
376 either DMSO or 20 nM Paclitaxel. Scale bar is 5 microns.

377 (D) Fold change in cell density after 96 hours in MDA-MB-231 cells treated with the  
378 specified siRNAs and either 500 nM UMK57 or DMSO. At least 52 wells per condition  
379 from three independent experiments were analyzed.

380 (E,F) Percent of total mitotic cells (E) and mitotic cells with multipolar spindles (F) in  
381 fixed populations after the indicated treatment. At least 60 fields from three independent  
382 experiments were analyzed per condition. All graphs show mean  $\pm$  SD. \*\*\*\* p<0.0001,  
383 \*\*\* p<0.001, \*\* p<0.01, \* p<0.05

384 (G) Schematic model for selective dependence of CIN cells on KIF18A function. See  
385 Discussion text for details.

386

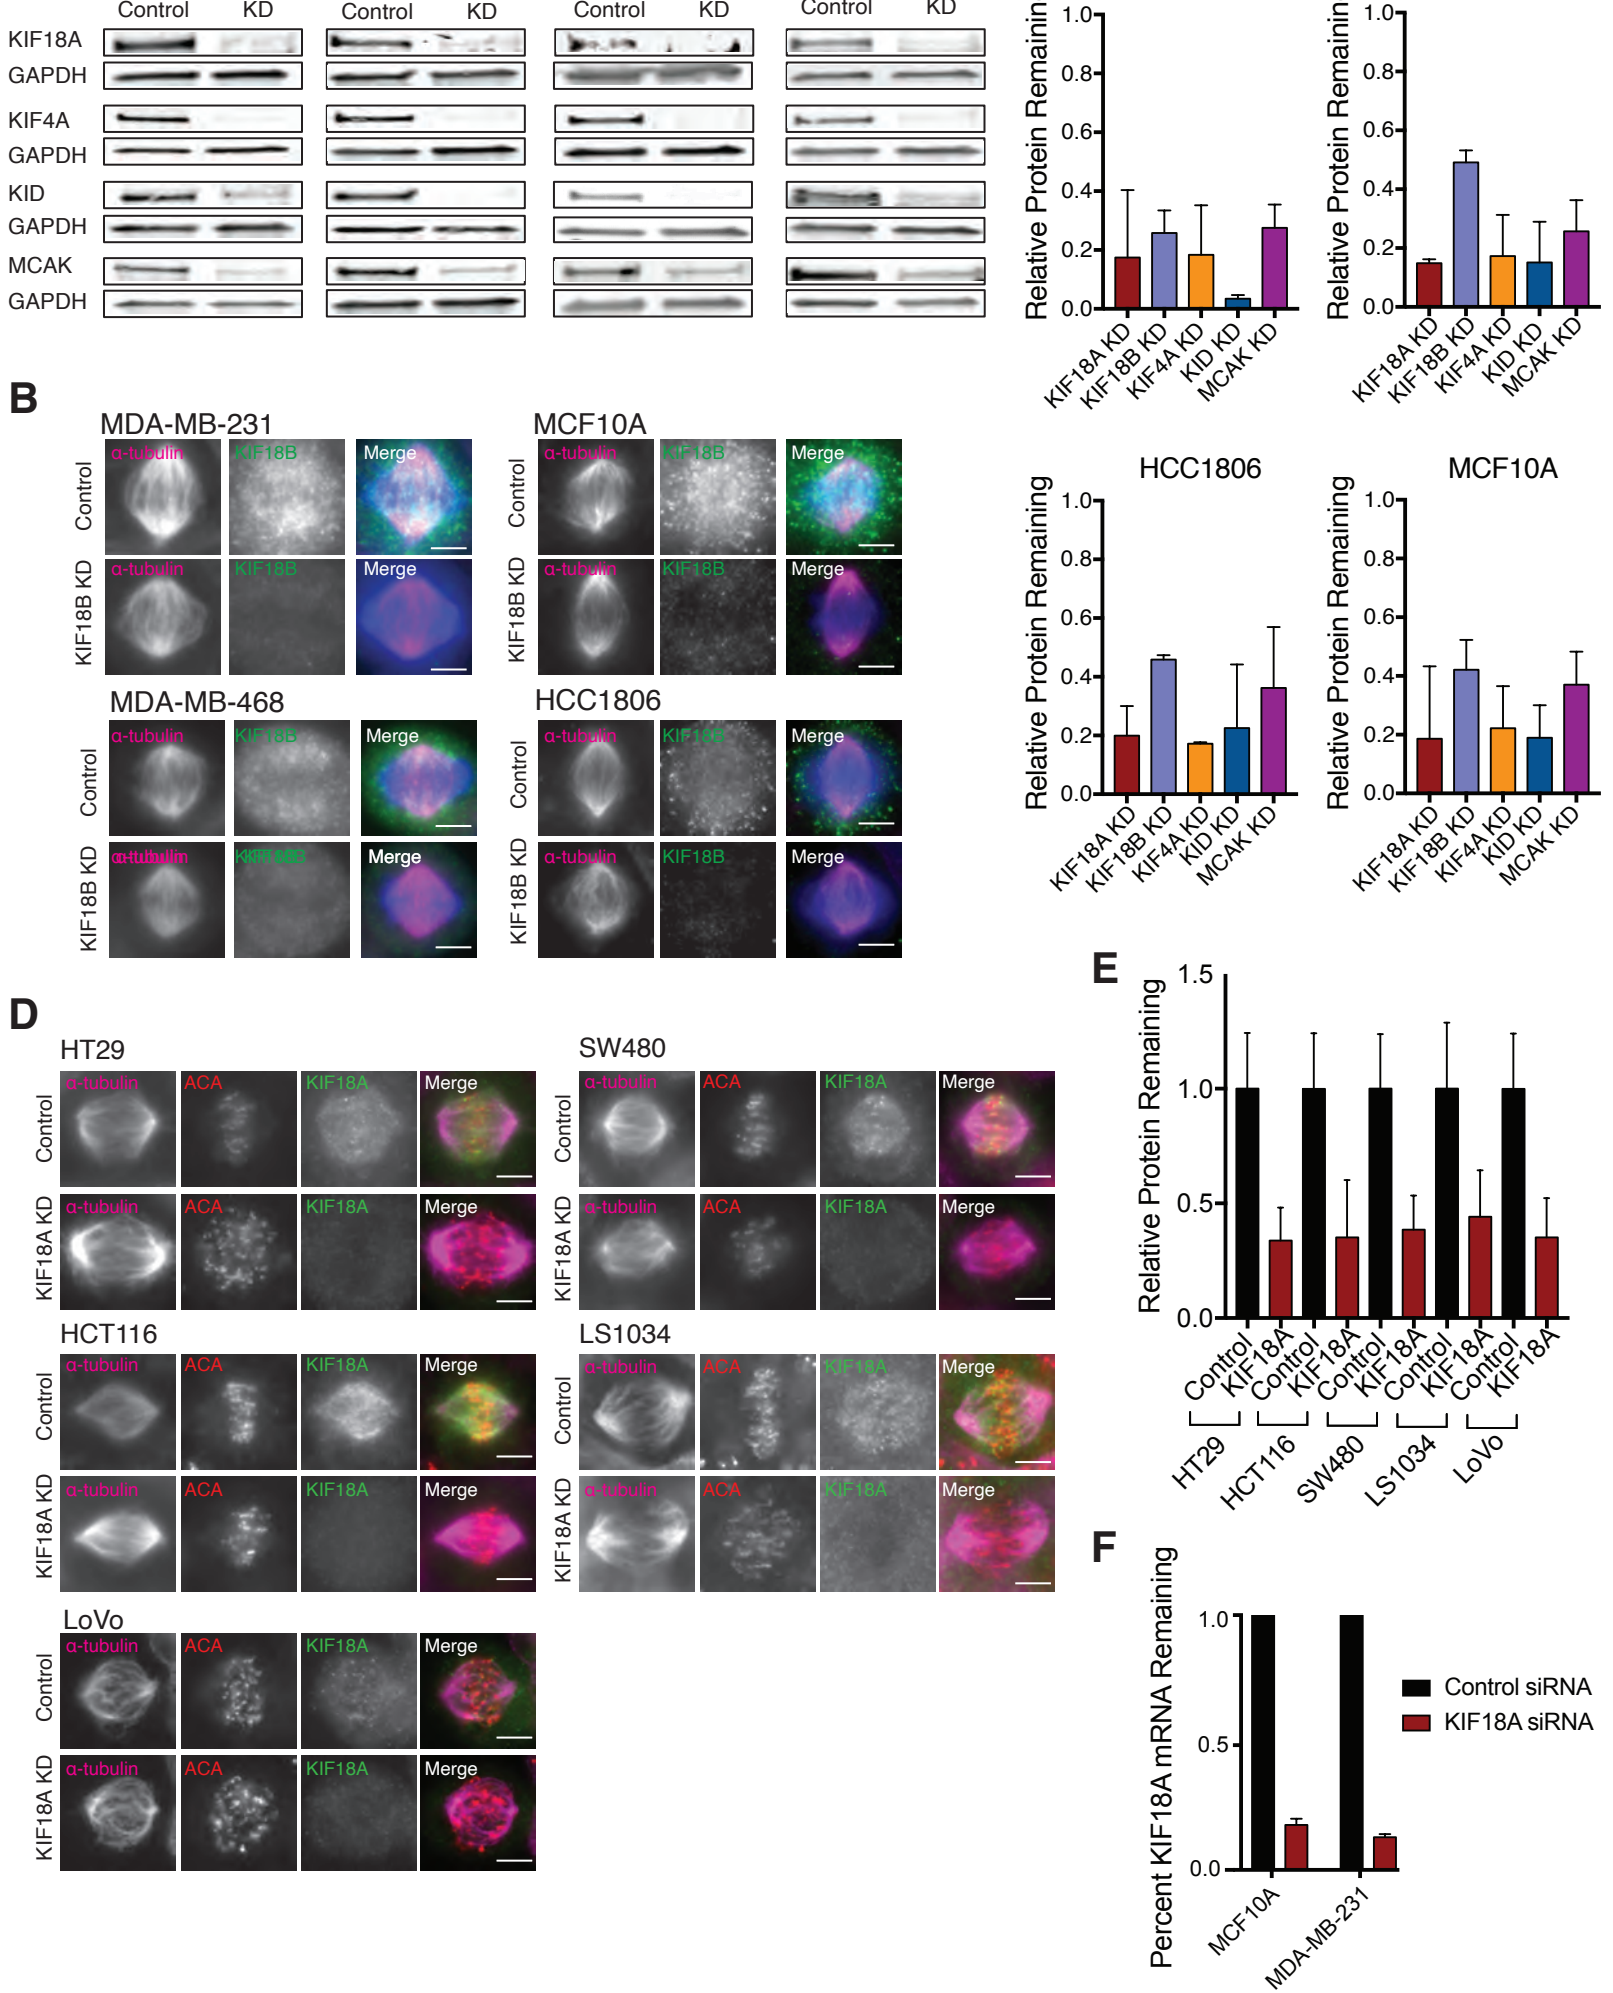

387 **Extended Data Figure 1. Kinesins are effectively depleted by siRNA in breast and**  
388 **colorectal cell lines.**

389 (A) Western blots showing siRNA knockdown (KD) efficiencies for the indicated kinesins  
390 in TNBC and diploid breast epithelial cells.

391 (B) Immunofluorescence images demonstrating efficiency of KIF18B KD in TNBC and  
392 diploid breast epithelial cells. Scale bar is 10 microns.

393 (C) Quantification of kinesin knockdowns in TNBC and diploid breast epithelial cells  
394 from 2-3 independent replicates. Relative remaining protein indicates the proportion of  
395 each kinesin remaining in cells after siRNA knockdown (measured via western blot or  
396 immunofluorescence) relative to control.

397 (D) Immunofluorescence images demonstrating efficiency of KIF18A siRNA-mediated  
398 knockdown in CRC cell lines. Scale bar is 10 microns.

399 (E) Quantification of kinesin knockdowns in CRC cell lines from 2-3 independent  
400 replicates. Relative remaining protein was measured via immunofluorescence, and all  
401 values within each cell line were normalized to control.

402 (F) Quantitative PCR measurements of KIF18A mRNA levels after siRNA-mediated  
403 knockdown in diploid breast epithelial cells and one TNBC cell line. Data from two  
404 independent replicates.

405 All graphs show mean +/- SD.

406





407 **Extended Data Figure 2. Kinetic cell proliferation assay validation.**

408 (A) Example trace of MDA-MD-231 cell density (cells/mm<sup>2</sup>) as a function of time over 96  
409 hours.

410 (B) Representative images of HCT116 cells showing the masks created for automated  
411 cell counting.

412 (C-D) Scatterplots of automated (C) LS1034 and (D) HCT116 cell counts using high-  
413 contrast brightfield microscopy as a function of cell counts of the same fields using a  
414 nuclear dye (Hoechst). Linear correlation indicates consistency in automated cell  
415 counting across different cell densities.

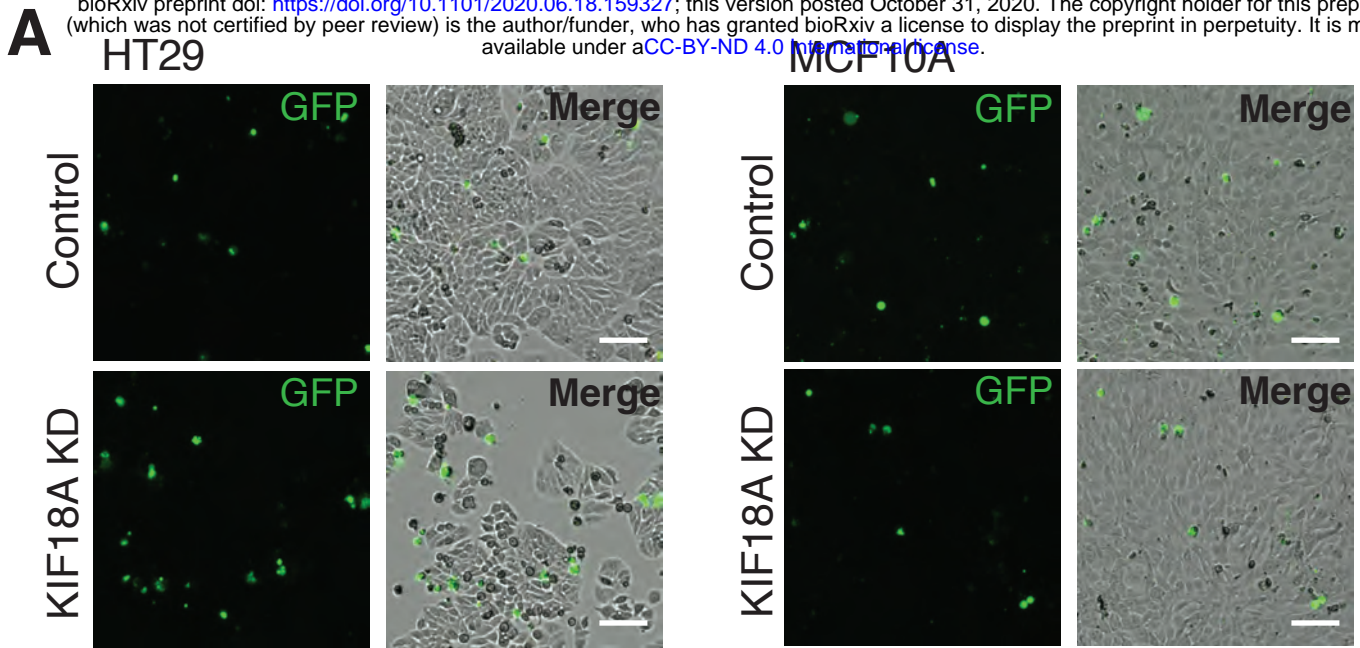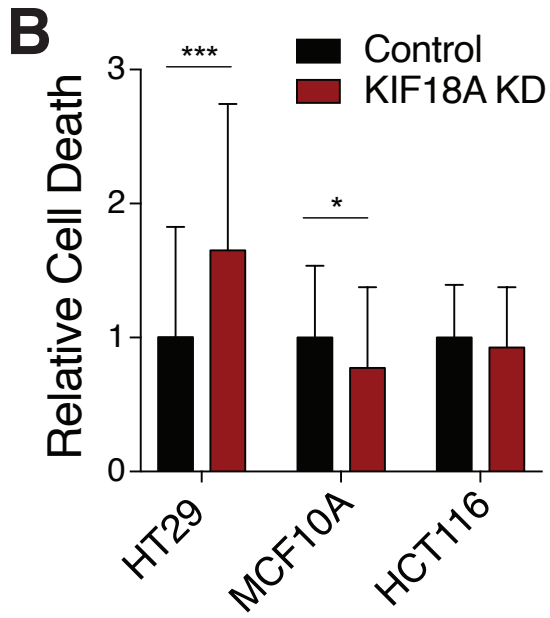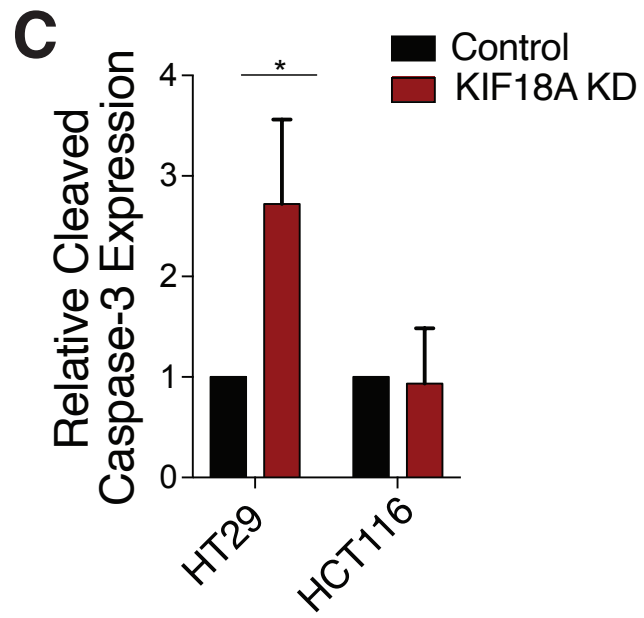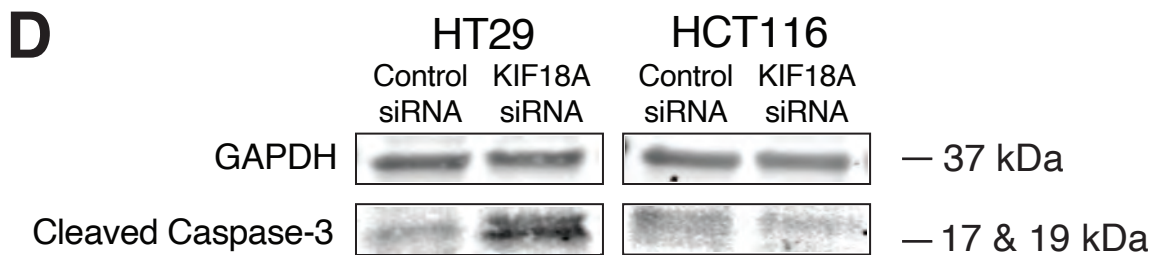

416 **Extended Data Figure 3. KIF18A depletion increases cell death in CIN cells.**

417 (A) Representative images of HT29 and MCF10A cells labeled with Celltox Green  
418 cytotoxicity dye five days after siRNA transfection. Scale bars are 100 microns.

419 (B) Relative cell death calculated as the normalized ratio of the change in Celltox-  
420 stained cell density to the change in total cell density over 96 hours. A total of at least  
421 68 wells from three independent experiments were analyzed.

422 (C) Relative expression of cleaved-caspase 3 measured via Western blot for each  
423 condition. Results are from three independent experiments.

424 (D) Western blot showing representative cleaved-caspase 3 (CC3) expression levels.

425 All graphs show mean +/- SD. \*\*\*\* p<0.0001, \*\*\* p<0.001, \*\* p<0.01, \* p<0.05

**A**

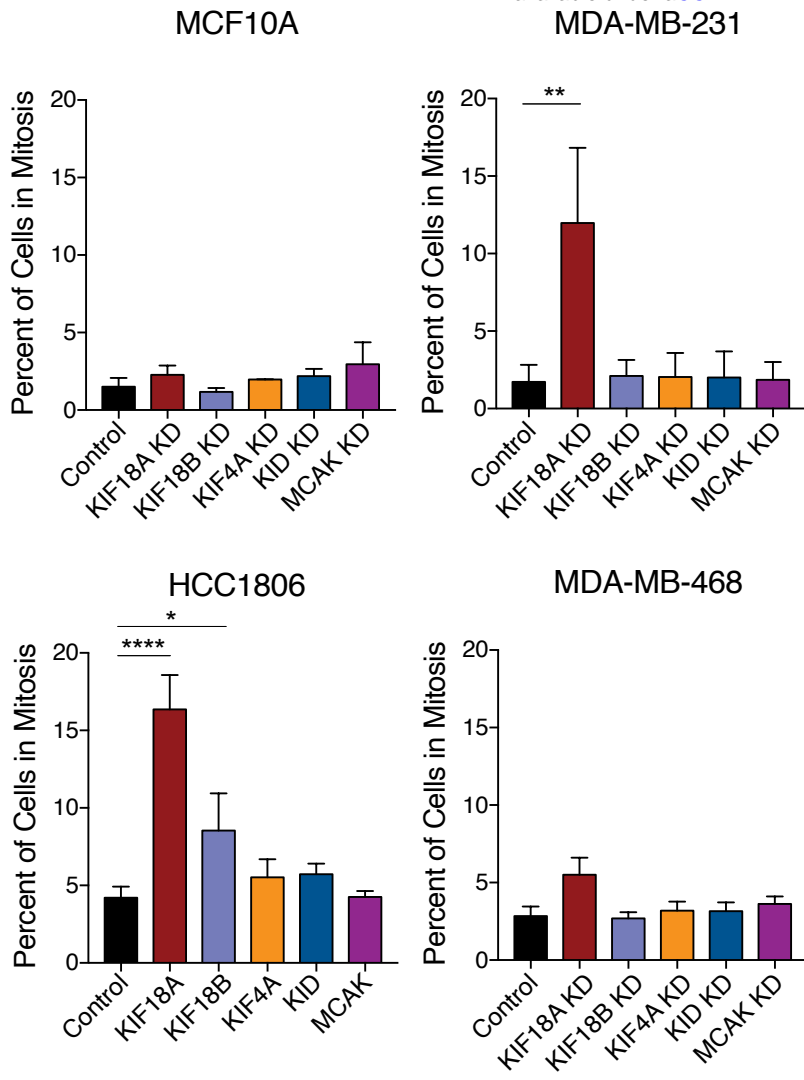

**B**

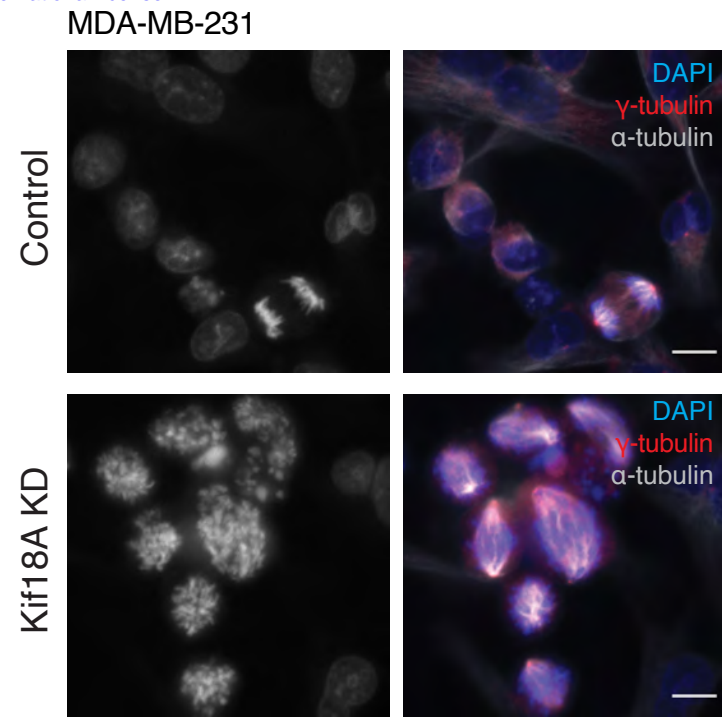

426 **Extended Data Figure 4. KIF18A KD increases the percentage of cells in mitosis**  
427 **for TNBC cells, but not for diploid breast epithelial cells.**

428 (A) Percent of cells in mitosis, as determined from fixed cell images, 48 hours after  
429 siRNA-mediated knockdown (KD) of the specified kinesins. Results are from three  
430 independent experiments.

431 (B) Representative images of MDA-MB-231 cells treated with either control or KIF18A  
432 siRNA. Scale bar is 10 microns.

433 All graphs show mean +/- SD. \*\*\*\* p<0.0001, \*\*\* p<0.001, \*\* p<0.01, \* p<0.05

**A**

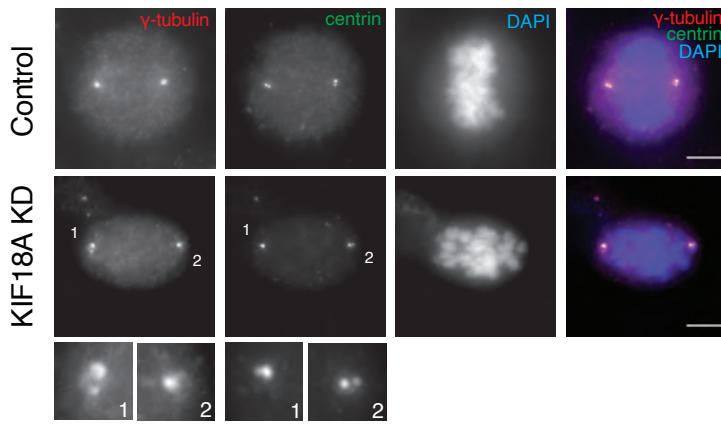

**B**

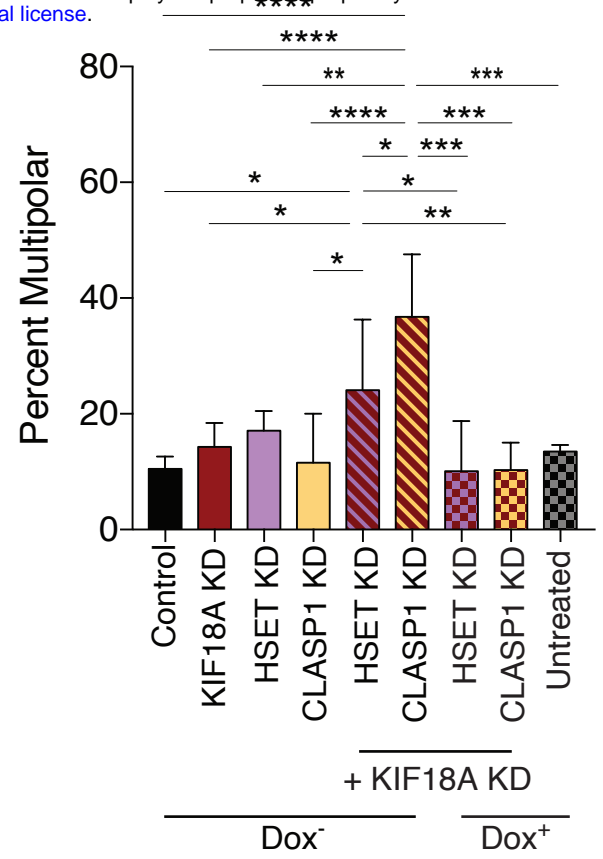

**C**

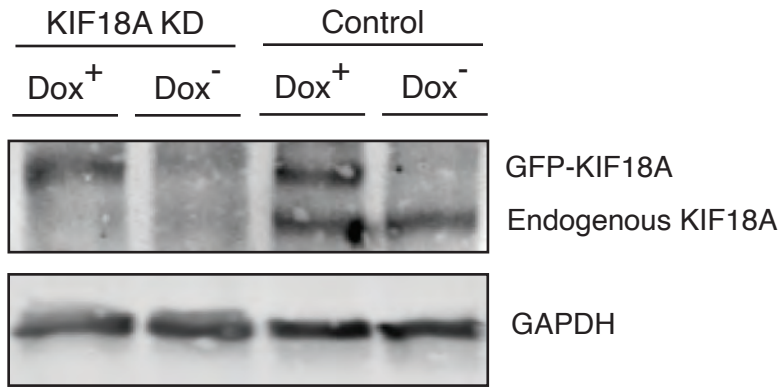

**D**

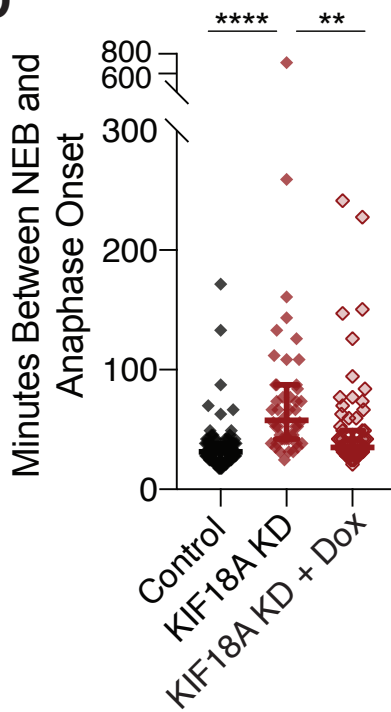

**E**

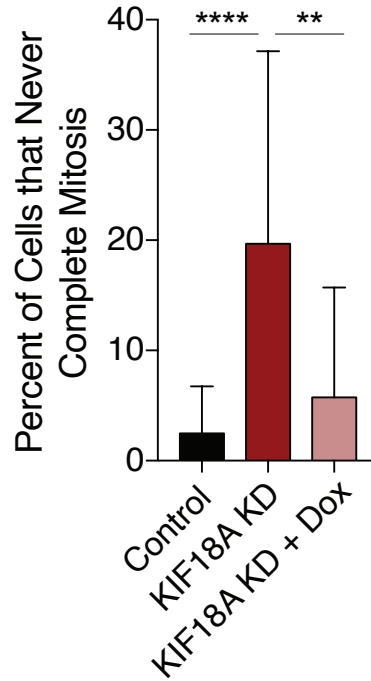

**F**

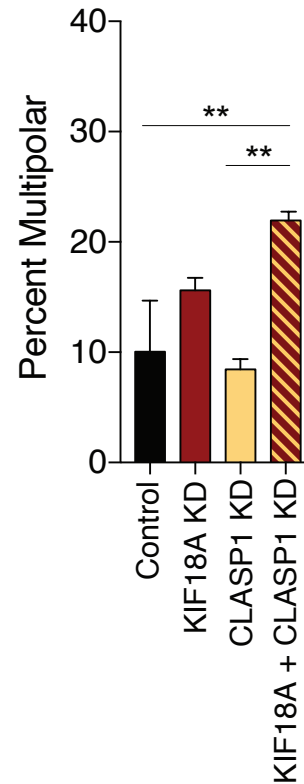

434 **Extended Data Figure 5. Co-depletion of KIF18A and CLASP1 or HSET lead to**  
435 **synergistic increases in multipolar spindle formation**

436 (A) Representative images of HeLa Kyoto cells treated with either control or KIF18A  
437 siRNA. Insets show enlarged images of the numbered poles in the KIF18A KD cell.  
438 Scale bar is 10 microns.

439 (B) Percent of HeLa Kyoto cells with multipolar spindles in each of the indicated single  
440 or double knockdowns, with or without induction of GFP-KIF18A via doxycycline.  
441 Results are from three independent experiments.

442 (C) Western blot depicting the amount of either endogenous KIF18A or GFP-KIF18A in  
443 cells treated with KIF18A or control siRNA with or without the addition of doxycycline.

444 (D) Time between nuclear envelope breakdown (NEB) and anaphase onset for HeLa  
445 Kyoto cells treated with control or KIF18A siRNA with or without the addition of  
446 doxycycline. Results from three independent experiments.

447 (E) Percent of HeLa Kyoto cells that fail to complete mitosis after treated with either  
448 control or KIF18A siRNA with or without doxycycline. Results from three independent  
449 experiments.

450 (F) Percent of SW480 cells with multipolar spindles in each of the indicated single or  
451 double knockdowns. Results from two independent experiments.

452 All graphs show mean +/- SD. \*\*\*\* p<0.0001, \*\*\* p<0.001, \*\* p<0.01, \* p<0.05



**A**

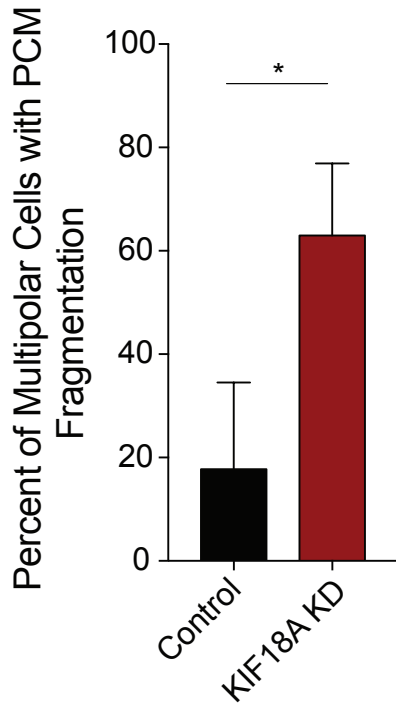

**B**

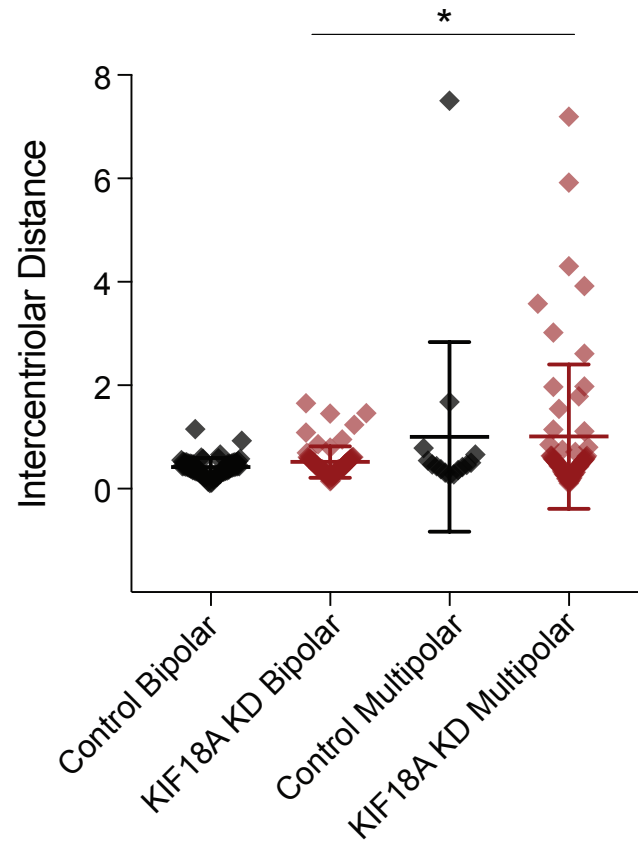

453 **Extended Data Figure 6. Loss of KIF18A causes centrosome fragmentation in**  
454 **HT29 cells**

455 A. Percent of HT29 cells with fragmented pericentriolar material (PCM), as indicated by  
456 the presence of  $\gamma$ -tubulin puncta lacking centrin-1. Results from three independent  
457 experiments.

458 B. Intercentriolar distance measurements (in microns) for HT29 cells in each indicated  
459 category. Between 15-63 measurements were made per category.

460 All graphs show mean +/- SD. \*\*\*\* p<0.0001, \*\*\* p<0.001, \*\* p<0.01, \* p<0.05

**A**

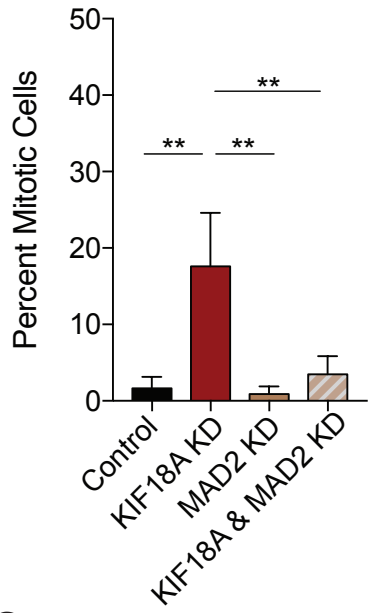

**B**

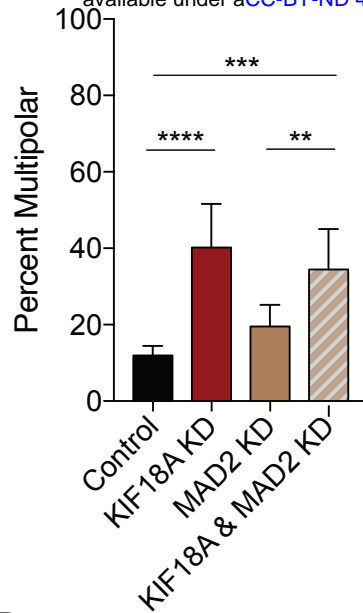

**E**

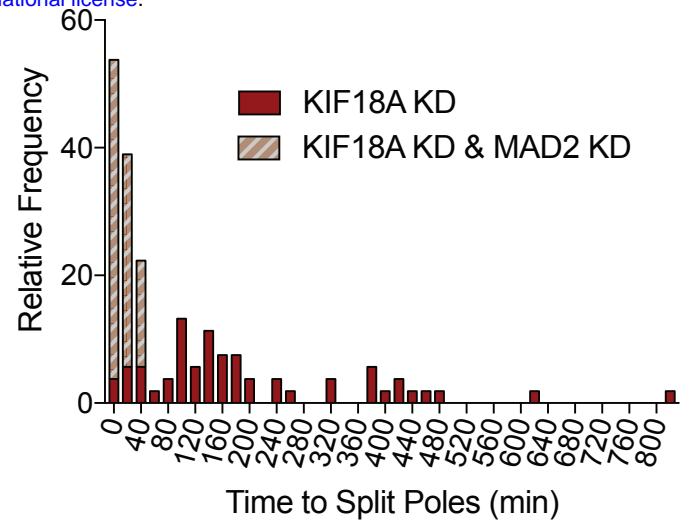

**C**

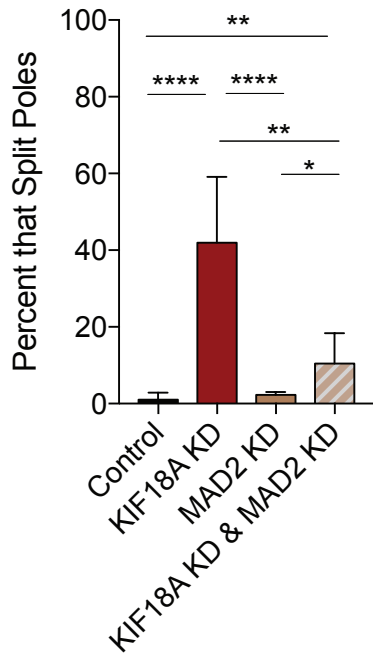

**D**

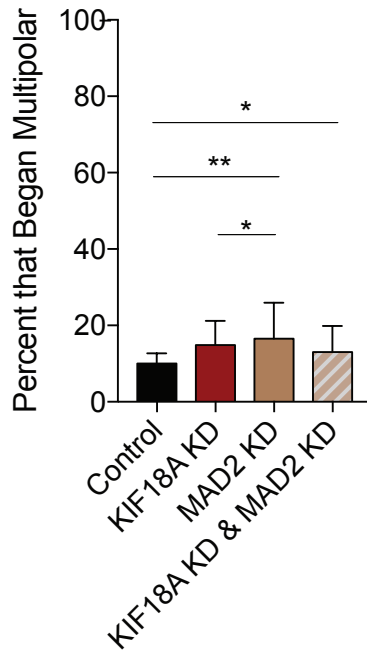

**F**

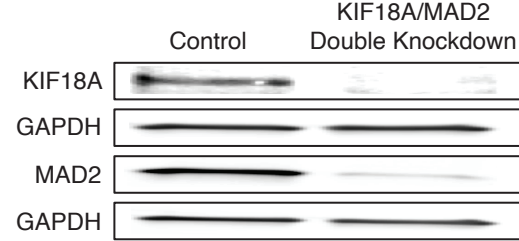

461 **Extended Data Figure 7. Spindle checkpoint inhibition rescues mitotic arrest but**  
462 **not multipolar spindle formation caused by KIF18A KD.**

463 (A-B) Percent of fixed MDA-MB-231 cells (A) in mitosis or (B) with multipolar spindles  
464 after the indicated siRNA KD. Results are from three independent experiments.

465 (C-D) Percent of live, siR-tubulin labeled MDA-MD-231 cells that (C) split poles during  
466 mitosis or (D) entered mitosis with more than two spindle poles. Results are from two  
467 independent experiments.

468 (E) Stacked histogram showing relative frequencies of the duration of time between  
469 NEB and pole splitting for siR-tubulin labeled MDA-MB-231 cells following KIF18A KD  
470 or KIF18A/MAD2 KD.

471 (F) Western blots depicting the amount of each specified protein remaining after  
472 treatment with either a double dose of control siRNA or a combination of KIF18A and  
473 MAD2 siRNA.

474 All graphs show mean +/- SD. \*\*\*\* p<0.0001, \*\*\* p<0.001, \*\* p<0.01, \* p<0.05

**A**

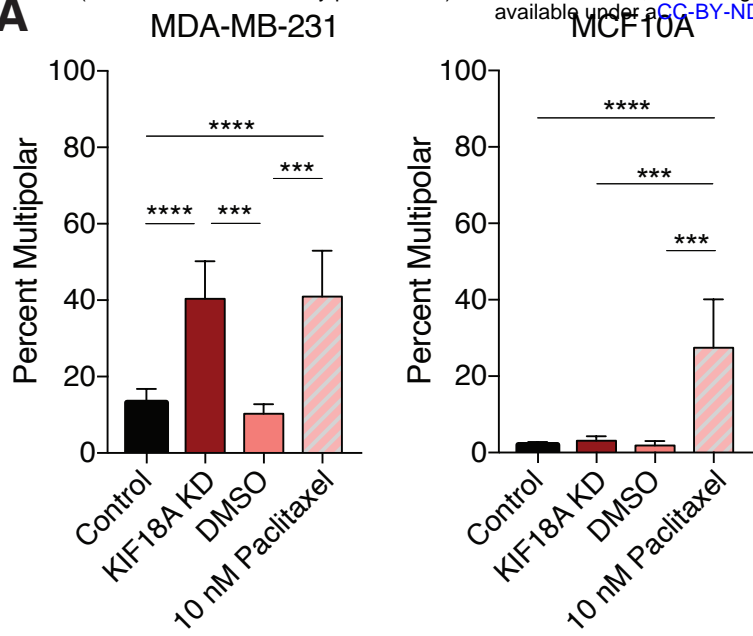

**B**

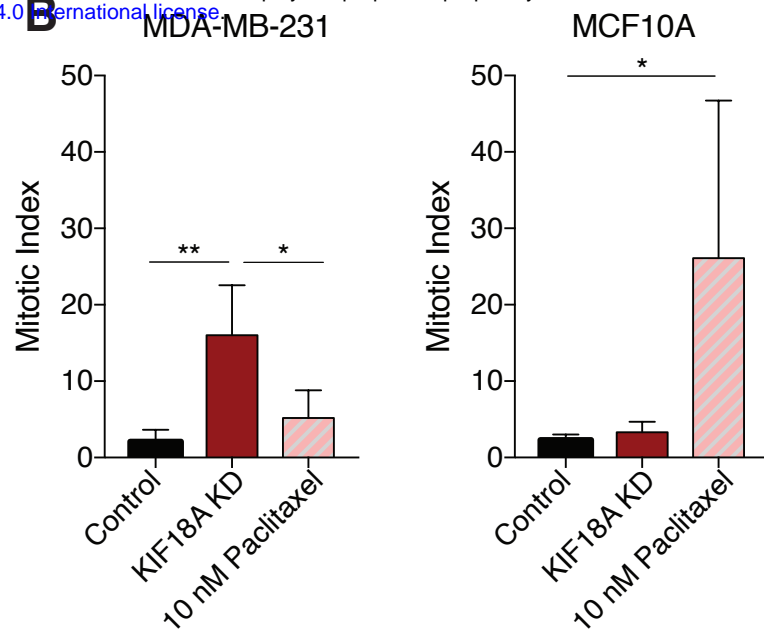

475 **Extended Data Figure 8. KIF18A KD and paclitaxel treatment cause similar mitotic**  
476 **defects in CIN MDA-MB-231 cells, but not diploid MCF10A cells.**

477 (A) Percentage of mitotic cells with multipolar spindles in fixed MDA-MB-231 or  
478 MCF10A cells treated with control siRNAs, KIF18A siRNAs, 10 nM paclitaxel, or DMSO.

479 (B) Percentage of fixed MDA-MB-231 and MCF10A cells in mitosis following treatment  
480 with control siRNAs, KIF18A siRNAs, 10 nM paclitaxel, or DMSO.

481 All graphs show mean +/- SD from 3 independent experiments. \*\*\*\* p<0.0001, \*\*\*  
482 p<0.001, \*\* p<0.01, \* p<0.05

**A**

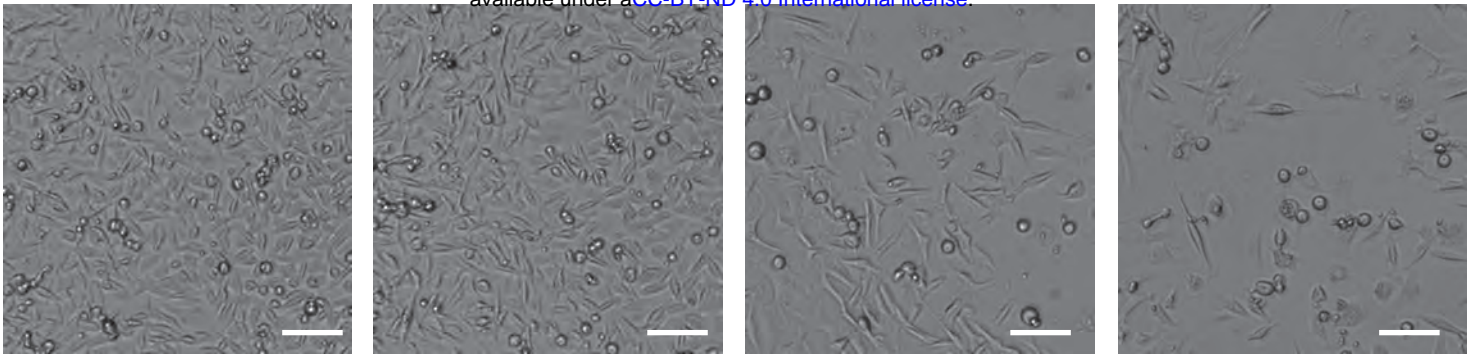

**B**

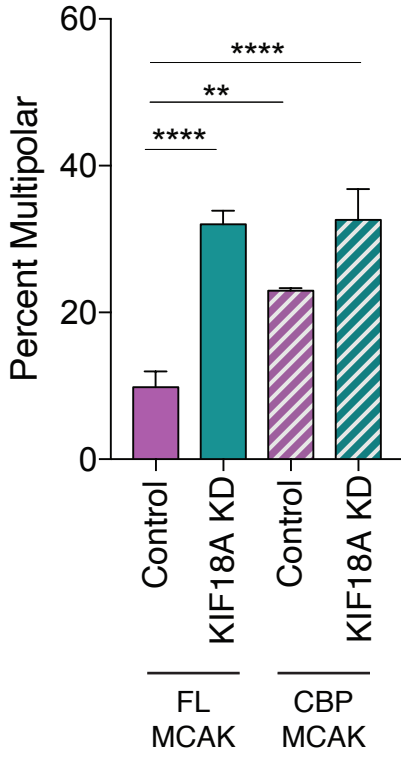

**C**

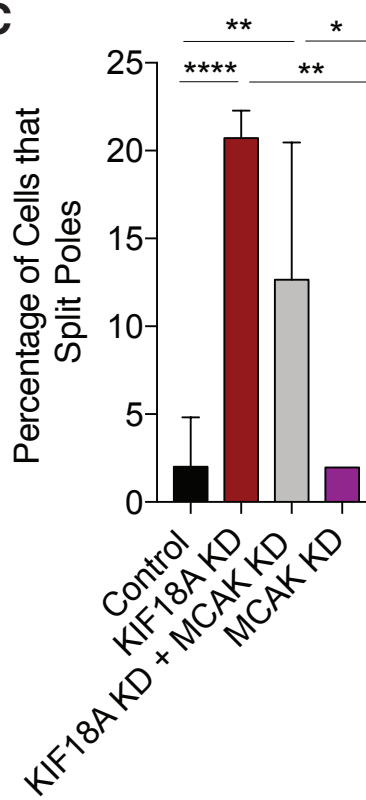

**D**

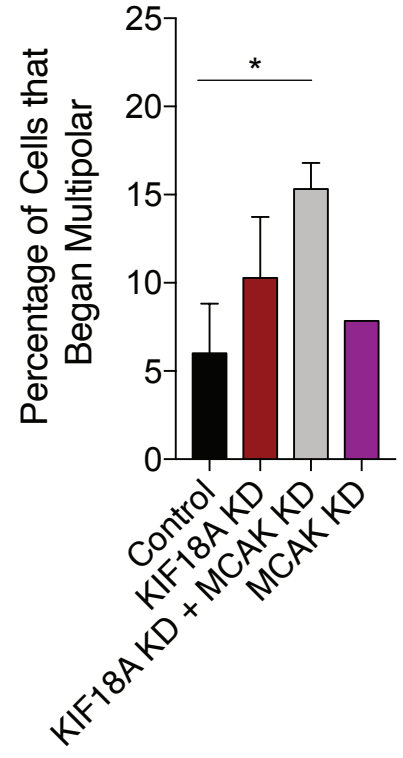

**E**

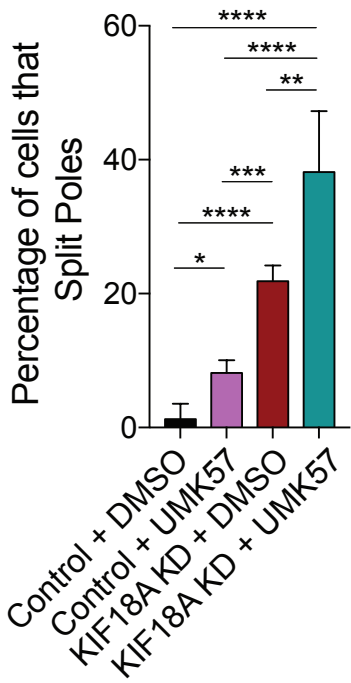

**F**

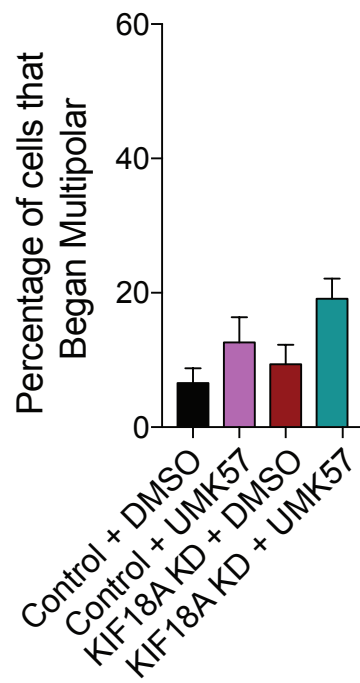

483 **Extended Data Figure 9. Proliferation and multipolar spindle defects caused by**  
484 **KIF18A KD are sensitive to changes in KIF2C/MCAK activity.**

485 (A) Representative images of MDA-MB-231 cell density 96 hours after the start of high-  
486 contrast brightfield imaging. Cells were treated with either control or KIF18A siRNA in  
487 combination with DMSO or 500 nM UMK57. Scale bar is 100 microns.

488 (B) Percent of MDA-MB-231 cells with multipolar spindles in cells treated with the  
489 indicated siRNAs and transfected with mCh-MCAK-FL or mCh-CPB-MCAK. Results are  
490 from two independent experiments.

491 (C-D) Percent of live, siR-tubulin labeled MDA-MB-231 cells that (C) split poles or (D)  
492 entered mitosis with more than two spindle poles after the indicated single or double  
493 knockdowns. MCAK KD results are from one experiment; all other results are from two  
494 independent experiments.

495 (E-F) Percent of live, siR-tubulin labeled MDA-MB-231 cells that (E) split poles or (F)  
496 entered mitosis with more than two spindle poles after the indicated treatments. Results  
497 from three independent experiments.

498 (D) Representative immunofluorescence images of mitotic MDA-MB-231 cells treated  
499 with either control or KIF18A siRNA in combination with either DMSO or 500 nM  
500 UMK57. Scale bars are 10 microns.



501 **Supplementary Videos**

502 **Supplementary Video 1.** Representative time-lapse movie of bipolar division in a siR-  
503 tubulin labeled MDA-MB-231 cell treated with control siRNA. Images were acquired  
504 every 2 min and are played back at 7 frames per second.

505

506 **Supplementary Video 2.** Representative time-lapse movie of spindle pole splitting in a  
507 siR-tubulin labeled MDA-MB-231 cell treated with KIF18A siRNA. Images were acquired  
508 every 2 min and are played back at 7 frames per second.

509

510 **Supplementary Video 3.** Representative time-lapse movie of a siR-tubulin labeled  
511 MDA-MB-231 cell treated with KIF18A siRNA entering mitosis with multiple spindle  
512 poles. Images were acquired every 2 min and are played back at 7 frames per second.

513

514 **Supplementary Video 4.** Representative time-lapse movie of spindle pole splitting in a  
515 siR-tubulin labeled MDA-MB-231 cell treated with KIF18A and MAD2 siRNAs. Images  
516 were acquired every 2 min and are played back at 7 frames per second.

517

518 **Supplementary Video 5.** Representative time-lapse movie of centrosome  
519 fragmentation in a monopolar MDA-MB-231 cell expressing mRFP-pericentrin after  
520 treatment with KIF18A siRNA and 20  $\mu$ M monastrol. Images were acquired every 2 min  
521 and are played back at 7 frames per second.

522

523 **Supplementary Video 6.** Representative time-lapse movie of spindle pole splitting in a  
524 siR-tubulin labeled MDA-MB-231 cell treated with KIF18A siRNA and 500 nM UMK57.  
525 Images were acquired every 2 min and are played back at 7 frames per second.

526

## 527 **Methods**

528

### 529 **Cell Culture and Transfections**

530 HT29, LoVo, SW480, LS1034, HCC1806, HCT116, MCF10A, MDA-MB-231, and MDA-  
531 MB-468 cells were purchased from ATCC. HeLa Kyoto acceptor cells for recombination  
532 mediated cassette exchange were previously described. All cell lines were validated by  
533 STR DNA fingerprinting using the Promega GenePrint® 10 System according to  
534 manufacturer's instructions (Promega #B9510). HT29, LoVo, SW480, MDA-MB-231,  
535 and MDA-MB-468 cells were cultured in DMEM/F-12 medium (Gibco) supplemented  
536 with 10% FBS (Gibco) and 1% penicillin/streptomycin (pen/strep). LS1034 and  
537 HCC1806 cells were cultured in RPMI 1640 medium (Gibco) with 10% FBS and 1%  
538 pen/strep. HCT116 cells were cultured in McCoy's 5A media (Gibco) with 10% FBS and  
539 1% pen/strep and MCF10A cells were cultured in DMEM/F-12 supplemented with 5%  
540 horse serum (Gibco), 20ng/ml epidermal growth factor, 0.5 µg/ml hydrocortisone, 100  
541 ng/ml cholera toxin, 10 µg/ml insulin, and 1% pen/strep. To inhibit specific kinesins, cells  
542 were treated with 5 pmol siRNA with Lipofectamine RNAiMAX Transfection Reagent  
543 (Invitrogen) in Opti-MEM Reduced-Serum Media (Gibco). Specific siRNAs include pools  
544 of Silencer and Silencer Select KIF18A (Invitrogen), KIF18B (Dharmacon), KIF4A  
545 (Invitrogen), KID/KIF22 (Invitrogen), MCAK/KIF2C (Dharmacon), MAD2 (Invitrogen),

546 CLASP1 (Dharmacon), HSET/KIFC1 (Dharmacon), and pools of scrambled-sequence  
547 negative control siRNAs (Invitrogen). For double knockdowns involving the inhibition of  
548 two proteins, Lipofectamine RNAiMAX was used at a lowered concentration (0.7X the  
549 concentration used for single knockdowns) to mitigate toxicity.

550

### 551 **Generation of Inducible HeLa Kyoto Cell Line**

552 HeLa Kyoto cells that inducibly express GFP or GFP-KIF18A were generated via  
553 recombination mediated cassette exchange, as previously described<sup>49</sup>. Briefly, a wild-  
554 type KIF18A siRNA and puromycin resistant plasmid was developed containing LoxP  
555 sites for recombination mediated cassette exchange. The LoxP containing plasmid was  
556 then transfected into HeLa Kyoto acceptor cells (a kind gift from Ryoma Ohi's lab)<sup>50</sup>, and  
557 cells which had undergone recombination were selected via puromycin. The open  
558 reading frame for a KIF18A wild-type siRNA resistant construct<sup>51</sup> and pEM791 vector<sup>49</sup>  
559 were amplified with primers designed for Gibson Assembly (New England BioLabs).  
560 After confirming the correct sequence of the Gibson assembled plasmid, recombination  
561 was achieved by transfecting the acceptor cells with the KIF18A plasmid and  
562 recombinase using an LTX transfection (Thermo Fisher Scientific). Recombination was  
563 initially selected for with 1  $\mu$ g/mL puromycin for 48 hours followed by a stricter selection  
564 with 2  $\mu$ g/mL puromycin for 48 hours prior to switching back to 1  $\mu$ g/mL puromycin. The  
565 resulting wild-type KIF18A inducible cell line was maintained in MEM Alpha (Life  
566 Technologies) with 10% FBS (Life Technologies) and 1  $\mu$ g/mL puromycin at 37°C, 5%  
567 CO<sub>2</sub>.

568

## 569 **Drug Treatments**

570 For experiments involving siRNA knockdown followed by drug treatment, the indicated  
571 concentrations of paclitaxel (Selleck Chemicals), nocodazole (Selleck Chemicals),  
572 and/or monastrol (Selleck Chemicals) were added to cells 24 hours after siRNA  
573 treatment. Three hours after drug addition, cells were either fixed and stained for  
574 immunofluorescence imaging or imaged live in a glass-bottom 24-well dish. To compare  
575 the effects of paclitaxel treatment to the effects of KIF18A KD in MDA-MB-231 and  
576 MCF10A cell lines, 10 nM of paclitaxel was added to cells 24 hours before fixing and  
577 staining for immunofluorescence imaging.

578

## 579 **Proliferation and Cytotoxicity Assays**

580 Cells were imaged in either a 96- or 24-well dish every two or four hours for up to five  
581 days using the Cytation 5 Cell Imaging Multi-Mode Reader (Biotek) driven by Gen5  
582 software (Biotek). A 4X Plan Fluorite 0.13 NA objective (Olympus) was used to capture  
583 images. Between imaging reads, cells were incubated at 37°C with 5% CO<sub>2</sub> using the  
584 Biospa 8 Automated Incubator (Biotek). Gen5 software (Biotek) was used to process  
585 images and to measure cell confluence and the number of cells/mm<sup>2</sup> using high-  
586 contrast brightfield images. Parameters including cell size and light-intensity thresholds  
587 were specified for each cell line. To determine rates of cell proliferation, the fold change  
588 in cells/mm<sup>2</sup> between the first and last reads of each well were calculated and  
589 normalized to the control for each experiment. One-way ANOVA with post-hoc Tukey's  
590 test was used to compare proliferation fold-change values across cell lines to determine  
591 statistical significance. For cytotoxicity assays, CellTox™ Green Dye (Promega) was

592 added to cell media prior to imaging, and the number of cells/mm<sup>2</sup> was recorded for both  
593 GFP and brightfield channels. After four days of imaging, the area under the  
594 proliferation curve for the CellTox-stained cells was divided by the area under the  
595 proliferation curve for the total number of cells, and this value was normalized to the  
596 control for each cell line as the metric for relative cell death. An unpaired t-test was used  
597 to determine significance between control and KIF18A KD for each cell line by  
598 comparing the normalized proliferation fold-change values.

599

### 600 **Automated Cell Count Validation**

601 Cells were seeded in a series of increasing densities in either a 96- or 24-well dish and  
602 allowed to adhere for 24 hours. Cells were then incubated with Hoechst stain  
603 (Invitrogen), a cell-permeable nuclear dye, for 30 minutes before being imaged using  
604 the Cytation 5 system as described previously. For each field, one high-contrast  
605 brightfield image and one fluorescence image were acquired, and Gen5 software was  
606 used to process images and analyze the number of cells/mm<sup>2</sup> using the parameters  
607 defined in the proliferation assays. The correlation between cell densities measured in  
608 the brightfield images and the fluorescence images was graphed as a scatterplot  
609 (Extended Data Fig 2).

610

### 611 **Immunofluorescence**

612 Cells were grown on glass coverslips and fixed using either -20°C methanol or 1%  
613 paraformaldehyde in -20°C methanol. Cells were blocked with 20% goat serum in  
614 antibody diluting buffer (Abdil- TBS, 1% BSA, 0.1% Triton X-100, and 0.1% sodium

615 azide) and incubated with the following primary antibodies: mouse anti- $\alpha$ -tubulin  
616 (DM1 $\alpha$ ) 1:500 (Millipore Sigma) for one hour at room temperature (RT), human anti-  
617 centromere antibody (ACA) 1:250 (Antibodies Incorporated) overnight at 4°C, rabbit anti-  
618  $\gamma$ -tubulin 1:500 (Abcam) for one hour at RT, mouse anti- $\gamma$ -tubulin 1:500 for one hour at  
619 RT (Abcam), rabbit anti-KIF18A 1:100 (Bethyl Laboratories) at 4°C overnight, mouse  
620 anti-centrin-1 1:500 (Santa Cruz Biotechnology) for one hour at RT, rabbit anti-mCherry  
621 1:500 (Abcam) for one hour at RT, and rabbit anti-KIF18B 1:2000<sup>52</sup> for one hour at RT.  
622 Secondary antibodies conjugated to Alexa Fluor 488, 594, and 647 (Molecular Probes)  
623 were used at concentrations of 1:15000 for one hour at RT. Coverslips were mounted  
624 onto glass slides using Prolong Gold anti-fade mounting medium with DAPI (Molecular  
625 Probes).

626

## 627 **Microscopy**

628 Fixed and live cell images were acquired using a Ti-E or Ti-2E inverted microscope  
629 (Nikon Instruments) driven by NIS Elements software (Nikon Instruments). Images were  
630 captured using a Clara cooled charge-coupled device (CCD) camera (Andor) or Prime  
631 Bsi sCMOS camera (Teledyne Photometrics) with a Spectra-X light engine  
632 (Lumencore). For live-cell imaging, cells in CO<sub>2</sub>-independent media (Gibco) were  
633 imaged using Nikon objectives Plan Apo 20X 0.75 NA or 40X 0.95 NA and an  
634 environmental chamber at 37°C. Fixed cell images were taken using Plan Apo 40X 0.95  
635 NA, Plan Apo  $\lambda$  60 $\times$  1.42 NA, and APO 100 $\times$  1.49 NA (Nikon).

636

## 637 **Western Blot**

638 Cells were lysed in PHEM lysis buffer (60 mM Pipes, 10 mM EGTA, 4mM MgCl<sub>2</sub>, and 25  
639 mM Hepes) with 1% Triton X-100 and protease inhibitors, incubated on ice for 10  
640 minutes, and centrifuged at maximum speed for 5 minutes. Laemmli buffer with β-  
641 mercaptoethanol was added to the supernatant prior to boiling for 10 minutes at 95°C.  
642 Lysates were run on 4-15% gradient gels (BioRad), transferred (75 minutes at 100V) to  
643 PVDF membrane (BioRad), and blocked for one hour in 1:1 Odyssey Blocking Buffer  
644 (Li-Cor) and TBS with 0.1% Tween-20. Membranes were incubated with primary  
645 antibodies overnight at 4°C. Primary antibodies included 1:1000 mouse anti-GAPDH  
646 (Invitrogen), 1:500 rabbit anti-KIF18A (Bethyl Laboratories), 1:1000 rabbit anti-Kif4A  
647 (Bethyl Laboratories), 1:1000 rabbit anti-KIF22 (Millipore Sigma), 1:1000 rabbit anti-  
648 MCAK (Abcam), 1:1000 rabbit anti-MAD2 (Bethyl Laboratories), and 1:1000 rabbit anti-  
649 Cleaved Caspase-3 (Cell Signaling Technology). Secondary antibodies included goat  
650 anti-Rabbit IgG DyLight 800 conjugate and goat anti-mouse IgG DyLight 680  
651 (Invitrogen), which were each diluted to 1:15000 in 1:1 Odyssey blocking buffer/TBS  
652 and added to the membrane for one hour at room temperature. Membranes were  
653 imaged using an Odyssey CLx (Li-Cor).

654

### 655 **Live Imaging**

656 Cells were plated in a glass-bottom 24-well dish and treated with the indicated siRNA  
657 approximately 24 hours before imaging. Six hours before imaging, the cell culture media  
658 was replaced with CO<sub>2</sub>-independent media containing 100μM SiR-tubulin  
659 (Cytoskeleton). For conditions involving UMK57 (a kind gift from Duane Compton) or  
660 DMSO, the specified drug was added to the CO<sub>2</sub>-independent media with siR-tubulin.



661 To image centrosomes, MDA-MB-231 cells were transfected with RFP-pericentrin via a  
662 4D nucleofector system (Lonza) prior to seeding in glass bottom dishes and siRNAs  
663 were added 24 hours later. Cells were imaged every 2 minutes for 16-20 hours using a  
664 40X 0.75 NA objective (Nikon).

665

### 666 **KIF2C/MCAK Overexpression**

667 MDA-MB-231 cells were transfected with either a construct containing mCherry fused to  
668 the N-terminus of full-length KIF2C/MCAK (mCh-MCAK-FL) or a construct containing  
669 the centromere binding domain of CENP-B fused to the C-terminus of mCherry and the  
670 N-terminus of MCAK (mCh-CPB-MCAK), both kind gifts from Linda Wordeman<sup>41</sup>. mCh-  
671 CPB-MCAK is similar to a previously described construct designed to increase MCAK  
672 activity at centromeres (RCPBM)<sup>41</sup> but contains mCherry instead of mRFP and an  
673 additional eight amino acids linking CPB and MCAK to improve expression.  
674 Transfections were performed using a 4D nucleofector system (Lonza) and plated on to  
675 12-mm glass coverslips. KIF18A or control siRNA was added to cells 24 hours post-  
676 transfection, and cells were fixed and stained for immunofluorescence after an  
677 additional 24 hours.

678

### 679 **Mitotic Timing and Mitotic Index Analyses**

680 To measure the length of mitosis, live cells were imaged every two minutes for 16-20  
681 hours using differential interference contrast (DIC) microscopy. The time between  
682 nuclear envelope breakdown (NEB) and anaphase onset (AO) was used to indicate the  
683 time a cell spent in mitosis. Mitotic index was measured using fixed-cell images by

684 counting the number of mitotic cells divided by the total number of cells. All mitotic index  
685 fields were taken with a 40x objective. An unpaired t-test was used to determine  
686 statistical significance between control and KIF18A KD conditions for each cell line  
687 using the mean percentages of mitotic cells from each experimental replicate.  
688 Contingency tables were created to compare the total number of cells that either divided  
689 or failed to divide; statistical significance was then determined using Chi-square tests to  
690 compare between the conditions within each cell line. An unpaired t-test was used to  
691 determine the statistical significance between control and KIF18A KD conditions in the  
692 mitotic timing analysis by comparing the averages of all the timing values (minutes from  
693 NEB to AO) between the two conditions within each cell line. For HeLa Kyoto mitotic  
694 timing rescue experiments, a one-way ANOVA was used to compare averages of the  
695 timing values between the three conditions.

696

### 697 **Mitotic Spindle Morphology Analyses**

698 To analyze mitotic spindle morphology, cells were fixed and stained for  $\gamma$ -tubulin,  $\alpha$ -  
699 tubulin, and centrin-1. Enough optical slices spaced 200 nm apart were captured to  
700 visualize the entire 3-D structure of the spindle. Spindles with three or more visible  $\gamma$ -  
701 tubulin-containing microtubule-organizing centers were classified as multipolar.  
702 Contingency tables were created to compare the total number of bipolar and multipolar  
703 cells between conditions, and statistical significance was determined using a Chi-square  
704 test. To characterize the structure of microtubule organizing centers across different  
705 conditions, pericentriolar material (PCM) and centrioles were stained and imaged in  
706 fixed cells. Cells were considered to possess fragmented pericentriolar material if they

707 had supernumerary poles observed via  $\gamma$ -tubulin staining but lacked centrioles (centrin-1  
708 puncta) at one or more of the poles. An unpaired t-test was used to determine statistical  
709 significance between control and KIF18A KD conditions for PCM fragmentation  
710 measurements. Intercentriolar distance, or the distance in microns between two  
711 centrioles in a pair, was measured from the center of one centriole to the center of the  
712 adjacent centriole. One-way ANOVA with post-hoc Tukey's test was used to compare  
713 intercentriolar distance measurements between conditions.

714

### 715 **Analysis of Live Spindle Pole Dynamics**

716 Movies of MDA-MB-231 cells stained with SiR-tubulin were analyzed to assess the  
717 timing of multipolar spindle formation. If a cell entered mitosis with three or more visible  
718 microtubule organizing centers, it was considered to have begun multipolar. If a cell  
719 entered mitosis with two microtubule organizing centers but ended up with three or  
720 more by the end of the movie, it was considered to have split poles. Contingency tables  
721 were created to compare the total number of cells that split poles and the total number  
722 that remained bipolar between conditions, and statistical significance was determined  
723 using a Chi-square test. The same analysis was conducted to compare differences  
724 across conditions in the proportion of cells that began multipolar.

725

### 726 **Knockdown Quantification Analysis**

727 The efficiency of siRNA-mediated kinesin knockdowns was measured via either  
728 quantitative western blot or immunofluorescence. ImageJ was used for all quantification.  
729 KIF18A knockdown efficiency in CRC cell lines was measured by comparing

730 background-subtracted KIF18A fluorescence intensity in cells treated with control or  
731 KIF18A siRNA. In TNBC cell lines, KIF18B knockdown efficiency was measured by  
732 comparing background-subtracted KIF18B fluorescence intensity in cells treated with  
733 control or KIF18B siRNA. All other knockdown quantifications were determined by  
734 Western blot analysis. For MCF10A and MDA-MB-231 cell lines, the KIF18A  
735 knockdown efficiency was further analyzed at the RNA level by qRT-PCR.

736

### 737 **qRT-PCR**

738 Total RNA extraction was carried out using RNeasy Mini Kit (Qiagen). Extracted RNA  
739 was screened by the Vermont Integrative Genomics Resource (VIGR) DNA Facility for  
740 purity and integrity using a 2100 Bioanalyzer (Agilent Technologies), and human  
741 GAPDH and human KIF18A Taqman probes and primers (Thermo Fisher Scientific)  
742 were used for reverse transcription and qRT-PCR. KIF18A RNA expression levels were  
743 normalized to GAPDH RNA levels in each cell line.

744

### 745 **Acknowledgements**

746 The authors wish to thank Dr. Carol Vallett, Dr. Marion Thurnauer, Dr. Marie Wood, and  
747 Dr. Christopher Anker for insightful discussions and suggestions. We also thank Dr. Uri  
748 Ben-David and Dr. Neil Ganem for sharing unpublished results and Linda Wordeman  
749 and Duane Compton for reagents. This work was supported by Susan G Komen grant  
750 CCR16377648, NIH grant GM121491, American Cancer Society Institutional Research  
751 Grant 14-196-01, and a Lake Champlain Cancer Research Organization pilot grant (to

752 JS) and by Department of Defense PRCRP Horizon Award W81XWH-17-1-0371 (to  
753 HM). The authors declare no competing financial interests.

754

## 755 **References**

756

757 1. Lengauer, C., Kinzler, K. W. & Vogelstein, B. Genetic instabilities in human cancers.  
758 *Nature* **396**, 643–649 (1998).

759 2. Bakhoum, S. F., Genovese, G. & Compton, D. A. Deviant Kinetochores Microtubule  
760 Dynamics Underlie Chromosomal Instability. *Curr Biol* **19**, 1937–1942 (2009).

761 3. Ertych, N. *et al.* Increased microtubule assembly rates influence chromosomal  
762 instability in colorectal cancer cells. *Nat Cell Biol* **16**, 779–791 (2014).

763 4. Cimini, D. *et al.* Merotelic kinetochore orientation is a major mechanism of aneuploidy  
764 in mitotic mammalian tissue cells. *The Journal of Cell Biology* **153**, 517–527 (2001).

765 5. Bakhoum, S. F., Thompson, S. L., Manning, A. L. & Compton, D. A. Genome stability  
766 is ensured by temporal control of kinetochore-microtubule dynamics. *Nat Cell Biol* **11**,  
767 27–35 (2009).

768 6. Ganem, N. J., Godinho, S. A. & Pellman, D. A mechanism linking extra centrosomes  
769 to chromosomal instability. *Nature* **460**, 278–282 (2009).

770 7. Bakhoum, S. F. *et al.* The mitotic origin of chromosomal instability. *Curr Biol* **24**,  
771 R148–R149 (2014).

772 8. Lee, A. J. X. *et al.* Chromosomal Instability Confers Intrinsic Multidrug Resistance.  
773 *Cancer Res* **71**, 1858–1870 (2011).

774 9. Bakhoum, S. F. *et al.* Chromosomal instability drives metastasis through a cytosolic  
775 DNA response. *Nature* **553**, 467–472 (2018).

776 10. Jordan, M. A. & Wilson, L. Microtubules as a target for anticancer drugs. *Nat Rev*  
777 *Cancer* **4**, 253–265 (2004).

778 11. Weaver, B. A. A. How Taxol/paclitaxel kills cancer cells. *Mol Biol Cell* **25**, 2677–  
779 2681 (2014).

780 12. Tischer, J. & Gergely, F. Anti-mitotic therapies in cancer. *J Cell Biol* **526**,  
781 jcb.201808077 (2018).

- 782 13. Zasadil, L. M. *et al.* Cytotoxicity of paclitaxel in breast cancer is due to chromosome  
783 missegregation on multipolar spindles. *Sci Transl Med* **6**, 229ra43-229ra43 (2014).
- 784 14. Mitchison, T. J., Pineda, J., Shi, J. & Florian, S. Is inflammatory micronucleation the  
785 key to a successful anti-mitotic cancer drug? *Royal Soc Open Biology* **7**, 170182 (2017).
- 786 15. Lehmann, B. D. *et al.* Identification of human triple-negative breast cancer subtypes  
787 and preclinical models for selection of targeted therapies. *J Clin Invest* **121**, 2750–2767  
788 (2011).
- 789 16. Mouradov, D. *et al.* Colorectal cancer cell lines are representative models of the  
790 main molecular subtypes of primary cancer. *Cancer Res* **74**, 3238–47 (2014).
- 791 17. Mayr, M. I. *et al.* The human kinesin Kif18A is a motile microtubule depolymerase  
792 essential for chromosome congression. *Curr Biol* **17**, 488–498 (2007).
- 793 18. Stumpff, J., Dassow, G. von, Wagenbach, M., Asbury, C. L. & Wordeman, L. The  
794 kinesin-8 motor Kif18A suppresses kinetochore movements to control mitotic  
795 chromosome alignment. *Dev Cell* **14**, 252–262 (2008).
- 796 19. Czechanski, A. *et al.* Kif18a is specifically required for mitotic progression during  
797 germ line development. *Dev Biol* **402**, 253–262 (2015).
- 798 20. Fonseca, C. L. *et al.* Mitotic chromosome alignment ensures mitotic fidelity by  
799 promoting interchromosomal compaction during anaphase. *J Cell Biol* **218**, 1086–1088  
800 (2019).
- 801 21. Janssen, L. M. E. *et al.* Loss of Kif18A Results in Spindle Assembly Checkpoint  
802 Activation at Microtubule-Attached Kinetochores. *Curr Biol* **0**, (2018).
- 803 22. Edzuka, T. & Goshima, G. Drosophila kinesin-8 stabilizes the kinetochore–  
804 microtubule interaction. *J Cell Biol* **5**, jcb.201807077 (2018).
- 805 23. Zhu, C. *et al.* Functional analysis of human microtubule-based motor proteins, the  
806 kinesins and dyneins, in mitosis/cytokinesis using RNA interference. *Mol Biol Cell* **16**,  
807 3187–3199 (2005).
- 808 24. Häfner, J., Mayr, M. I., Möckel, M. M. & Mayer, T. U. Pre-anaphase chromosome  
809 oscillations are regulated by the antagonistic activities of Cdk1 and PP1 on Kif18A. *Nat*  
810 *Commun* **5**, 4397 (2014).
- 811 25. Malaby, H. L., Lessard, D. V., Berger, C. L. & Stumpff, J. KIF18A's neck linker  
812 permits navigation of microtubule-bound obstacles within the mitotic spindle. *Life Sci*  
813 *Alliance* **2**, e201800169 (2019).

- 814 26. Logarinho, E. *et al.* CLASPs prevent irreversible multipolarity by ensuring spindle-  
815 pole resistance to traction forces during chromosome alignment. *Nat Cell Biol* **14**, 295–  
816 303 (2012).
- 817 27. Kwon, M. *et al.* Mechanisms to suppress multipolar divisions in cancer cells with  
818 extra centrosomes. *Gene Dev* **22**, 2189–2203 (2008).
- 819 28. Kleylein-Sohn, J. *et al.* Acentrosomal spindle organization renders cancer cells  
820 dependent on the kinesin HSET. *J Cell Sci* **125**, 5391–5402 (2012).
- 821 29. Pannu, V. *et al.* HSET overexpression fuels tumor progression via centrosome  
822 clustering-independent mechanisms in breast cancer patients. *Oncotarget* **6**, 6076–  
823 6091 (2015).
- 824 30. Zhao, X. *et al.* Host microtubule plus-end binding protein CLASP1 influences  
825 sequential steps in the Trypanosoma cruzi infection process. *Cell Microbiol* **15**, 571–584  
826 (2013).
- 827 31. Maiato, H. & Logarinho, E. Mitotic spindle multipolarity without centrosome  
828 amplification. *Nat Cell Biol* **16**, 386–394 (2014).
- 829 32. Gorbsky, G. J., Chen, R.-H. & Murray, A. W. Microinjection of Antibody to Mad2  
830 Protein into Mammalian Cells in Mitosis Induces Premature Anaphase. *J Cell Biol* **141**,  
831 1193–1205 (1998).
- 832 33. Stumpff, J., Wagenbach, M., Franck, A., Asbury, C. L. & Wordeman, L. Kif18A and  
833 chromokinesins confine centromere movements via microtubule growth suppression  
834 and spatial control of kinetochore tension. *Dev Cell* **22**, 1017–1029 (2012).
- 835 34. Yvon, A.-M. C., Wadsworth, P. & Jordan, M. A. Taxol Suppresses Dynamics of  
836 Individual Microtubules in Living Human Tumor Cells. *Mol Biol Cell* **10**, 947–959 (1999).
- 837 35. Jordan, M. A., Thrower, D. & Wilson, L. Effects of vinblastine, podophyllotoxin and  
838 nocodazole on mitotic spindles. Implications for the role of microtubule dynamics in  
839 mitosis. *J Cell Sci* **102** ( Pt 3), 401–16 (1992).
- 840 36. Brabander, M. D., Geuens, G., Nuydens, R., Willebrords, R. & Mey, J. D. Taxol  
841 induces the assembly of free microtubules in living cells and blocks the organizing  
842 capacity of the centrosomes and kinetochores. *Proc National Acad Sci* **78**, 5608–5612  
843 (1981).
- 844 37. Hornick, J. E. *et al.* Live-cell analysis of mitotic spindle formation in taxol-treated  
845 cells. *Cell Motil Cytoskel* **65**, 595–613 (2008).



- 846 38. Kapoor, T. M., Mayer, T. U., Coughlin, M. L. & Mitchison, T. J. Probing spindle  
847 assembly mechanisms with monastrol, a small molecule inhibitor of the mitotic kinesin,  
848 Eg5. *The Journal of Cell Biology* **150**, 975–988 (2000).
- 849 39. Wordeman, L., Decarreau, J., Vicente, J. J. & Wagenbach, M. Divergent  
850 microtubule assembly rates after short- versus long-term loss of end-modulating  
851 kinesins. *Mol Biol Cell* **27**, 1300–1309 (2016).
- 852 40. Orr, B., Talje, L., Liu, Z., Kwok, B. H. & Compton, D. A. Adaptive Resistance to an  
853 Inhibitor of Chromosomal Instability in Human Cancer Cells. *Cell Reports* **17**, 1755–  
854 1763 (2016).
- 855 41. Wordeman, L., Wagenbach, M. & Dassow, G. von. MCAK facilitates chromosome  
856 movement by promoting kinetochore microtubule turnover. *J Cell Biology* **179**, 869–879  
857 (2007).
- 858 42. Liu, X. *s et al.* Germinal Cell Aplasia in Kif18a Mutant Male Mice Due to Impaired  
859 Chromosome Congression and Dysregulated BubR1 and CENP-E. *Genes Cancer* **1**,  
860 26–39 (2010).
- 861 43. Zhu, H. *et al.* Targeted deletion of Kif18a protects from colitis-associated colorectal  
862 (CAC) tumors in mice through impairing Akt phosphorylation. *Biochem Bioph Res Co*  
863 **438**, 97–102 (2013).
- 864 44. Zhang, C. *et al.* Kif18A is involved in human breast carcinogenesis. *Carcinogenesis*  
865 **31**, 1676–1684 (2010).
- 866 45. du, Y., English, C. A. & ohi, R. The kinesin-8 Kif18A dampens microtubule plus-end  
867 dynamics. *Curr Biol* **20**, 374–380 (2010).
- 868 46. Stumpff, J. *et al.* A tethering mechanism controls the processivity and kinetochore-  
869 microtubule plus-end enrichment of the kinesin-8 Kif18A. *Mol Cell* **43**, 764–775 (2011).
- 870 47. Quinton, R. J. *et al.* Whole genome doubling confers unique genetic vulnerabilities  
871 on tumor cells. *Biorxiv* 2020.06.18.159095 (2020) doi:10.1101/2020.06.18.159095.
- 872 48. Cohen-Sharir, Y. *et al.* Selective vulnerability of aneuploid human cancer cells to  
873 inhibition of the spindle assembly checkpoint. *Biorxiv* 2020.06.18.159038 (2020)  
874 doi:10.1101/2020.06.18.159038.
- 875 49. Khandelia, P., Yap, K. & Makeyev, E. V. Streamlined platform for short hairpin RNA  
876 interference and transgenesis in cultured mammalian cells. *Proc National Acad Sci* **108**,  
877 12799–12804 (2011).
- 878 50. Sturgill, E. G., Norris, S. R., Guo, Y. & ohi, R. Kinesin-5 inhibitor resistance is driven  
879 by kinesin-12. *J Cell Biology* **213**, 213–227 (2016).

880 51. Kim, H., Fonseca, C. & Stumpff, J. A unique kinesin-8 surface loop provides  
881 specificity for chromosome alignment. *Mol Biol Cell* **25**, 3319–3329 (2014).

882 52. Shin, Y. *et al.* Biased Brownian motion as a mechanism to facilitate nanometer-  
883 scale exploration of the microtubule plus end by a kinesin-8. *Proc National Acad Sci*  
884 **112**, E3826-35 (2015).

885
